# Supplementary material for: GTF2H4 regulates partial EndMT via NF-κB activation through NCOA3 phosphorylation in ischemic diseases
Source: PubMed Central journal article supplement — Innovation (Camb). 2024 Jan 8;5(2):100565. doi: 10.1016/j.xinn.2024.100565 (PMC10876913; doi:10.1016/j.xinn.2024.100565), 2024-01-08

Fig. 1e

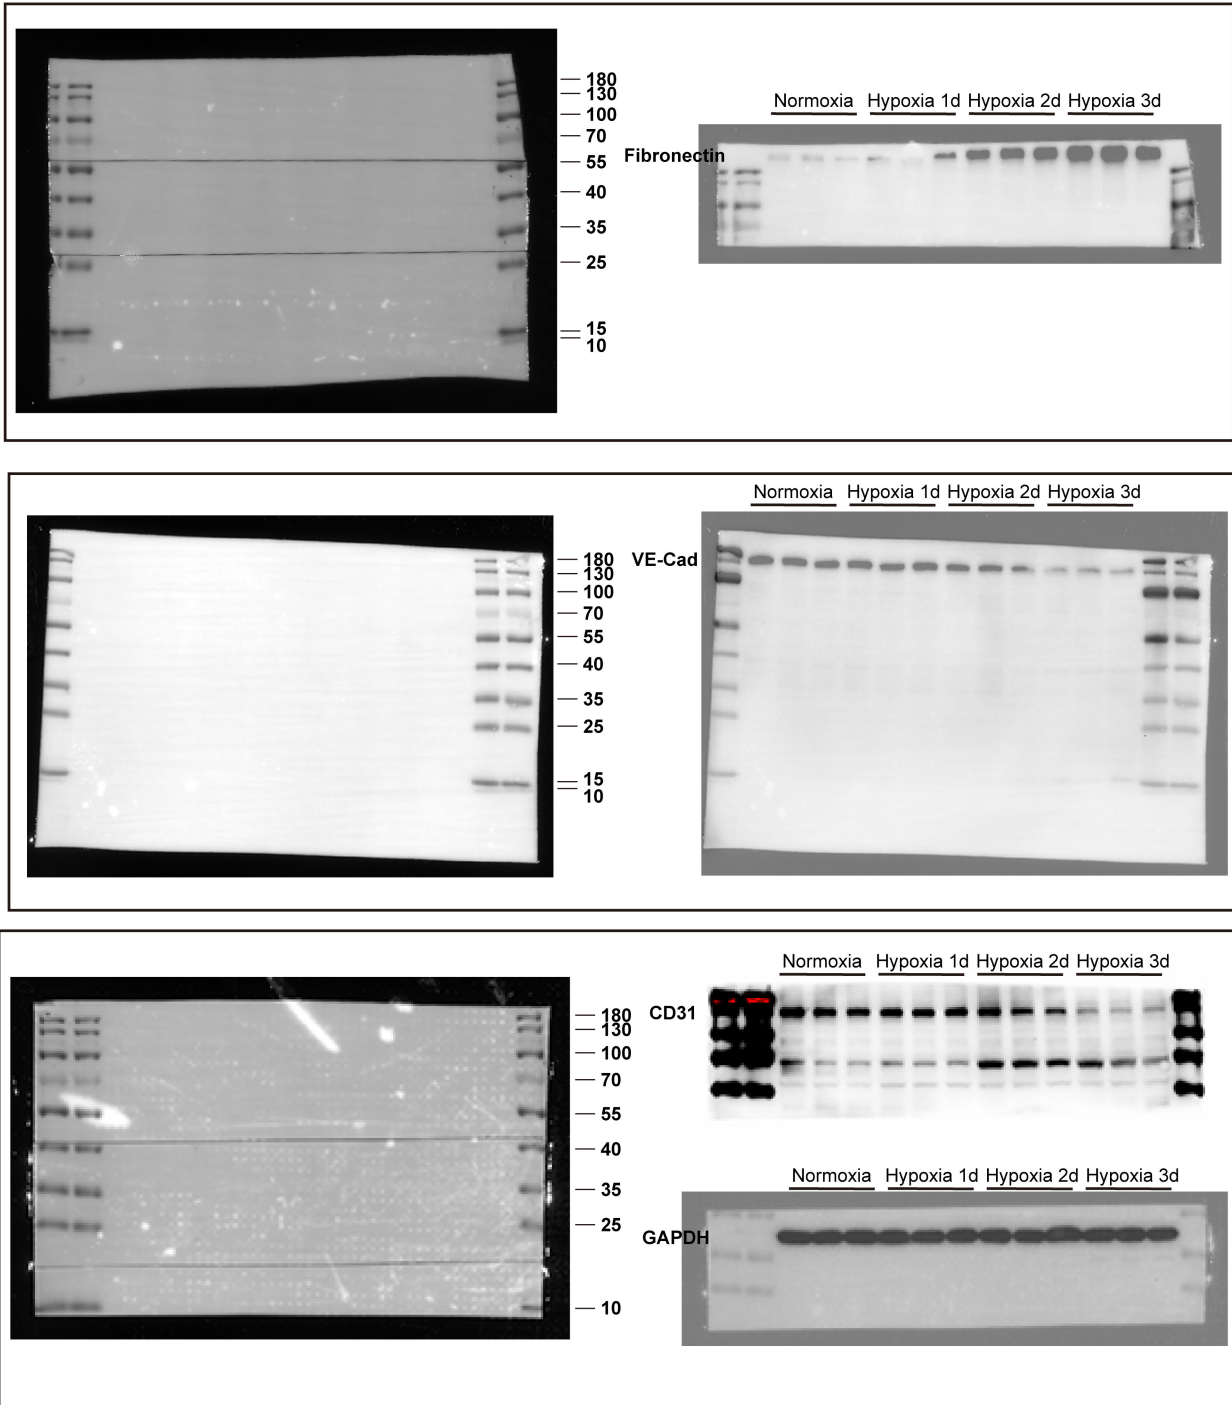

Fig. 1e Continued

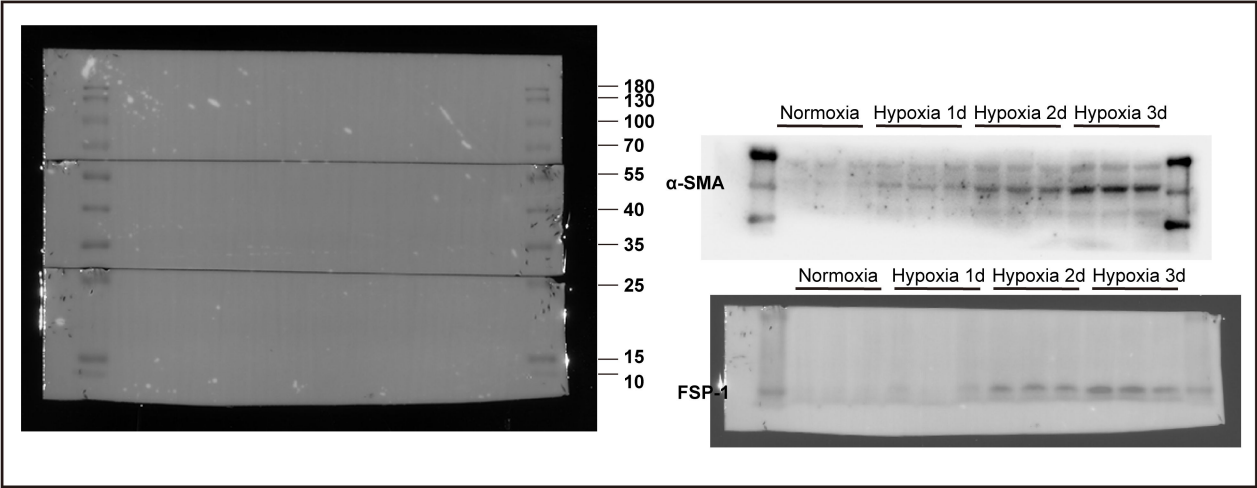

**Fig. 2c HMEC-1**

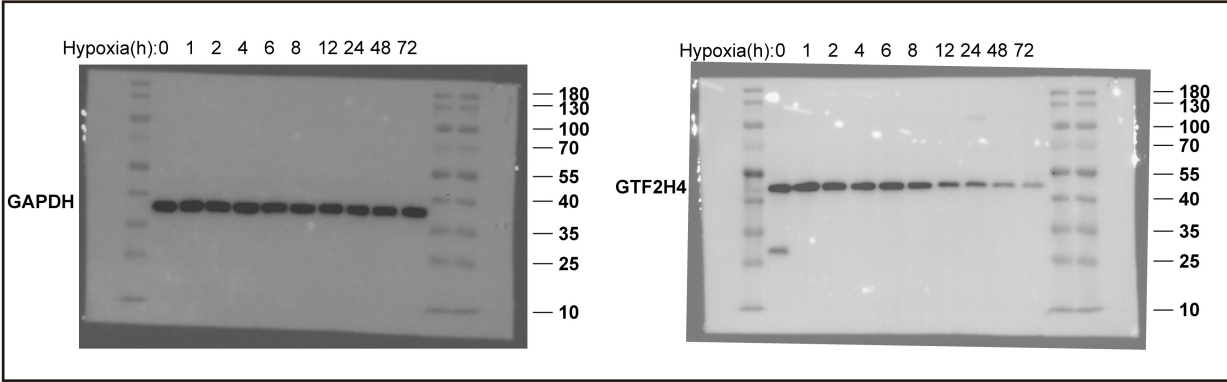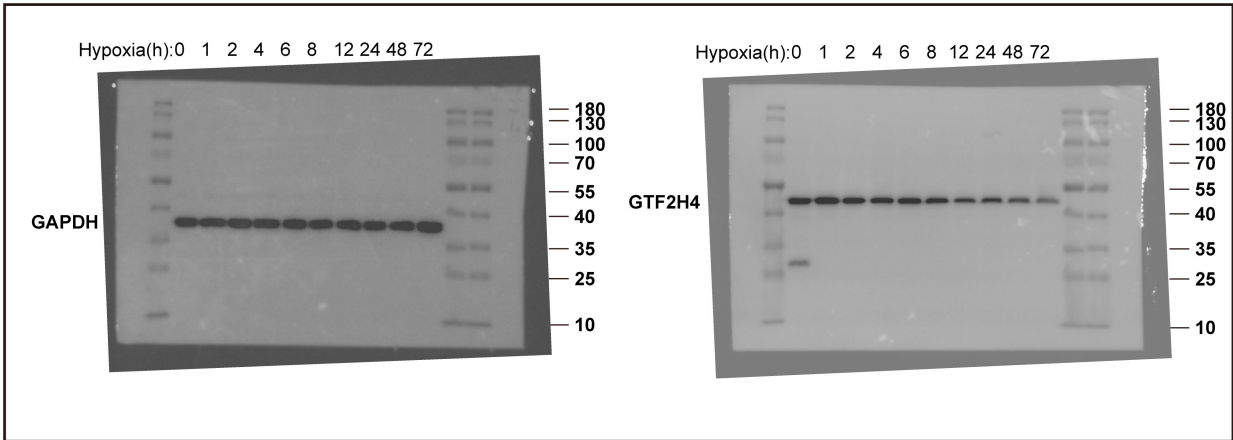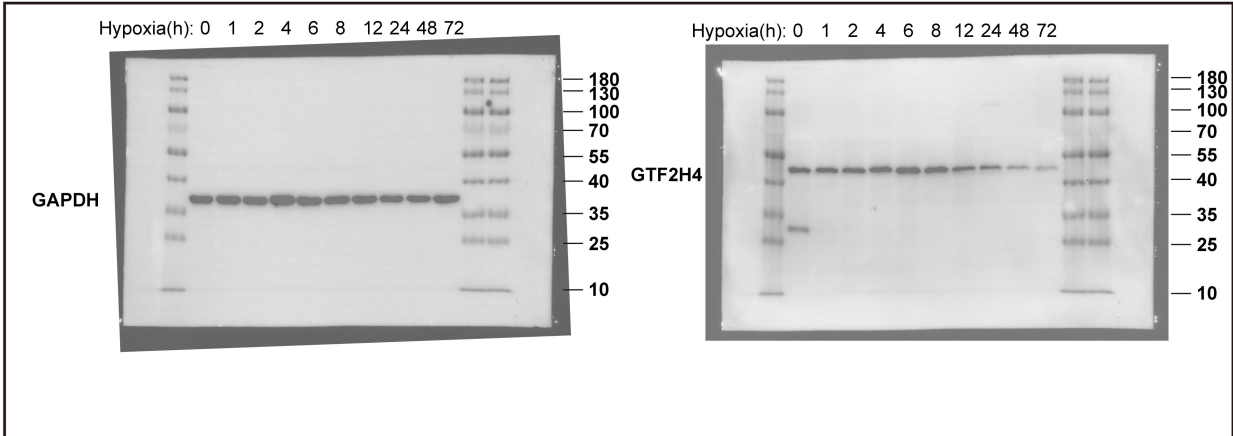

**Fig. 2c MCMEC**

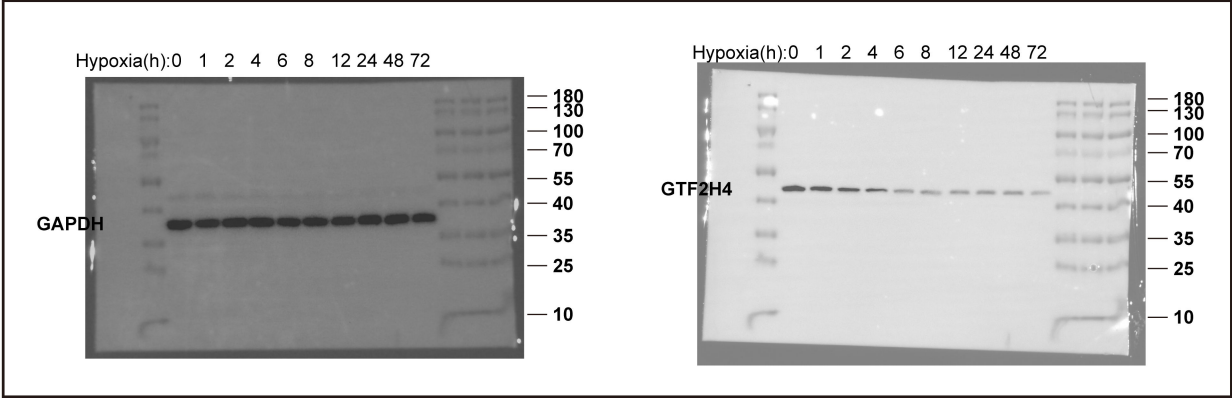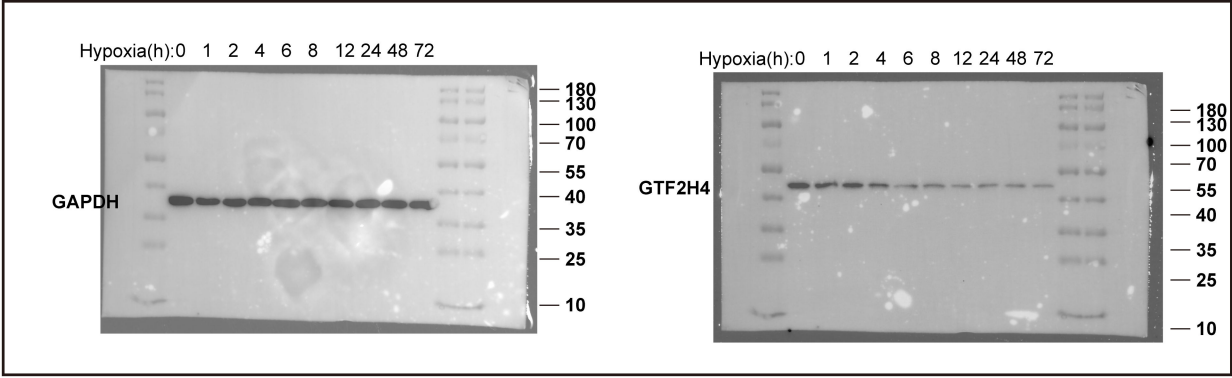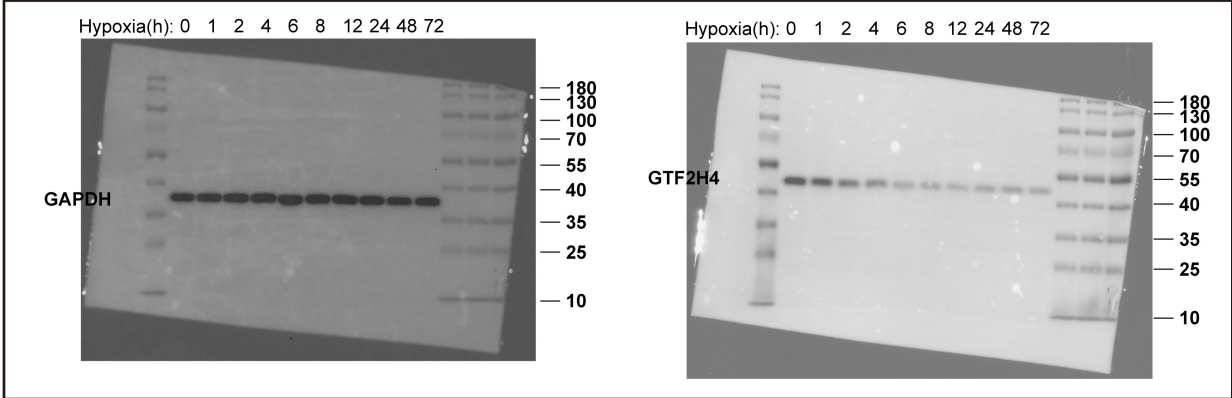

**Fig. 2f**

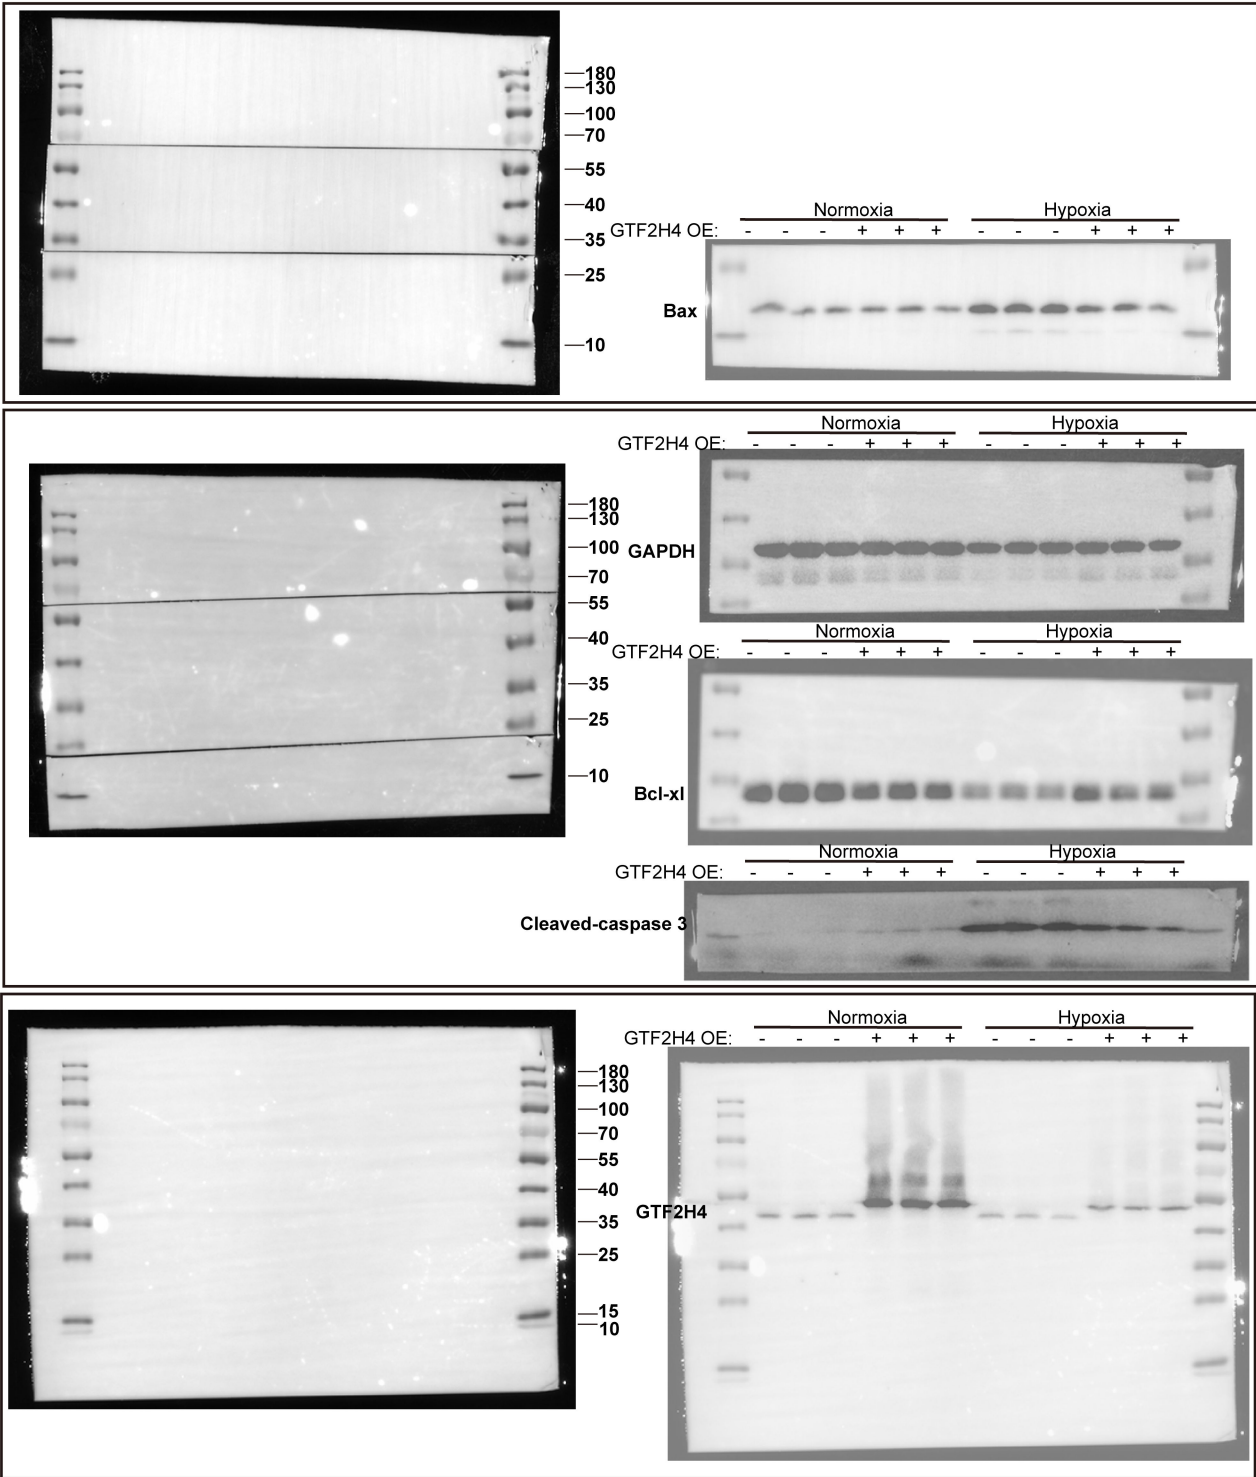

**Fig. 2g**

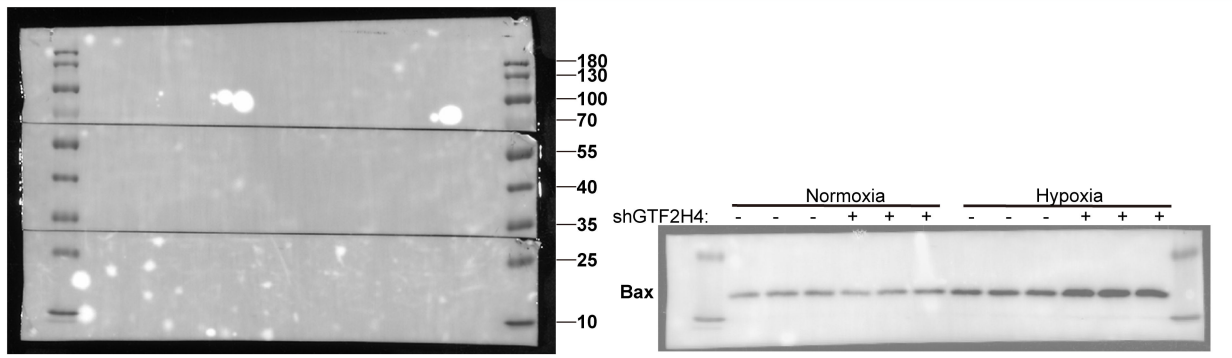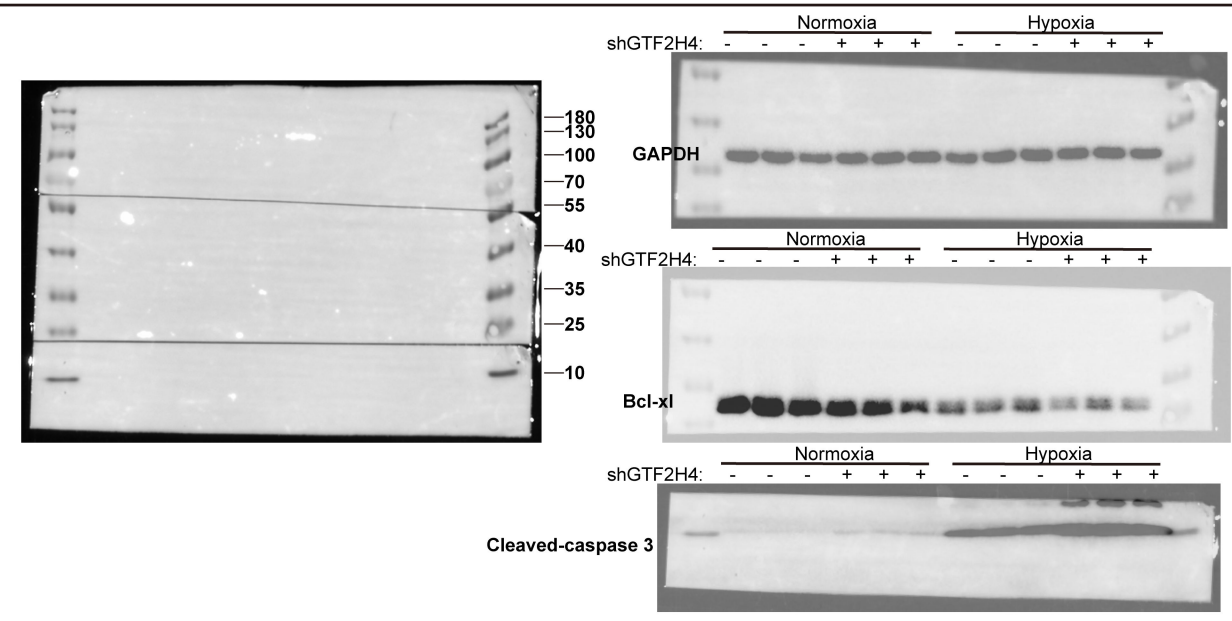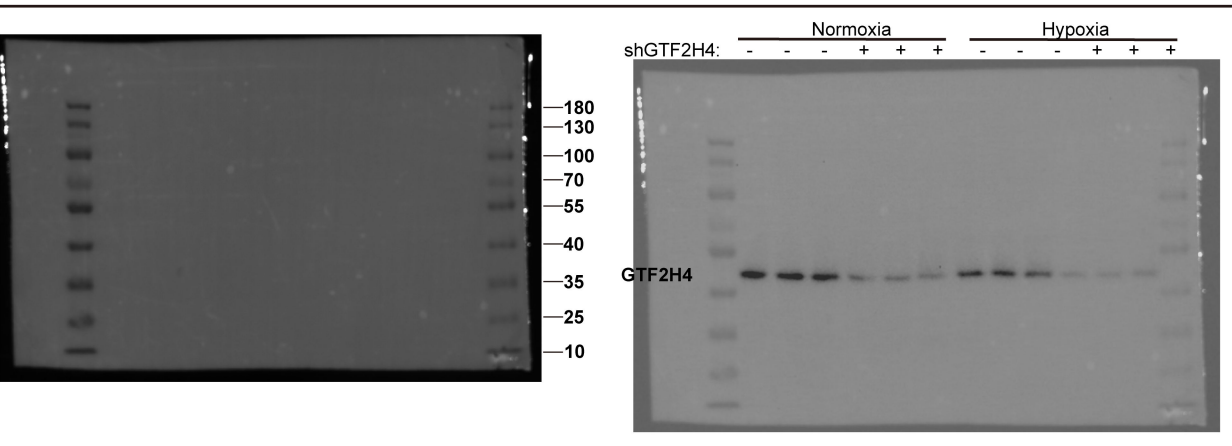

**Fig. 2j**

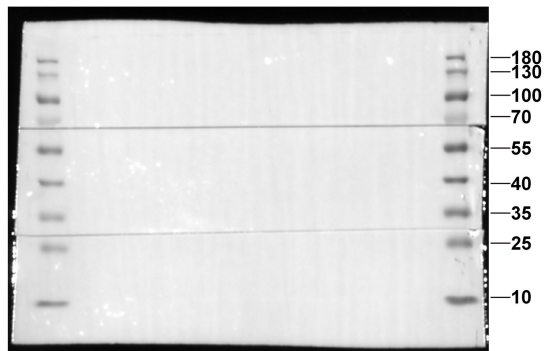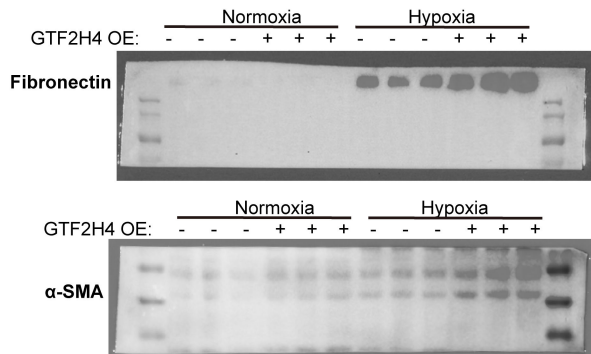

| GTF2H4 OE: | Normoxia |   |   | Hypoxia |   |   |
|------------|----------|---|---|---------|---|---|
|            | -        | - | + | -       | - | + |

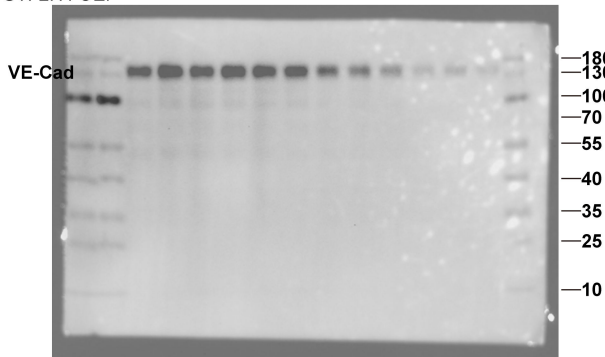

| GTF2H4 OE: | Normoxia |   |   | Hypoxia |   |   |
|------------|----------|---|---|---------|---|---|
|            | -        | - | + | -       | - | + |

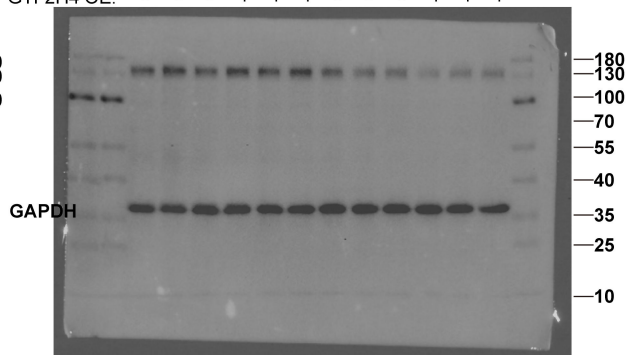

| GTF2H4 OE: | Normoxia |   |   | Hypoxia |   |   |
|------------|----------|---|---|---------|---|---|
|            | -        | - | + | -       | - | + |

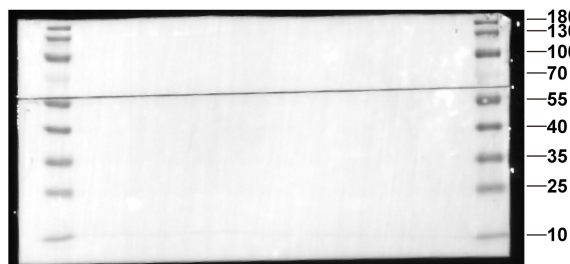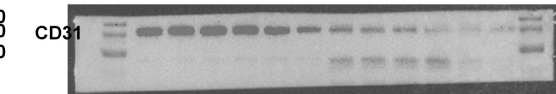

**Fig. 2j Continued**

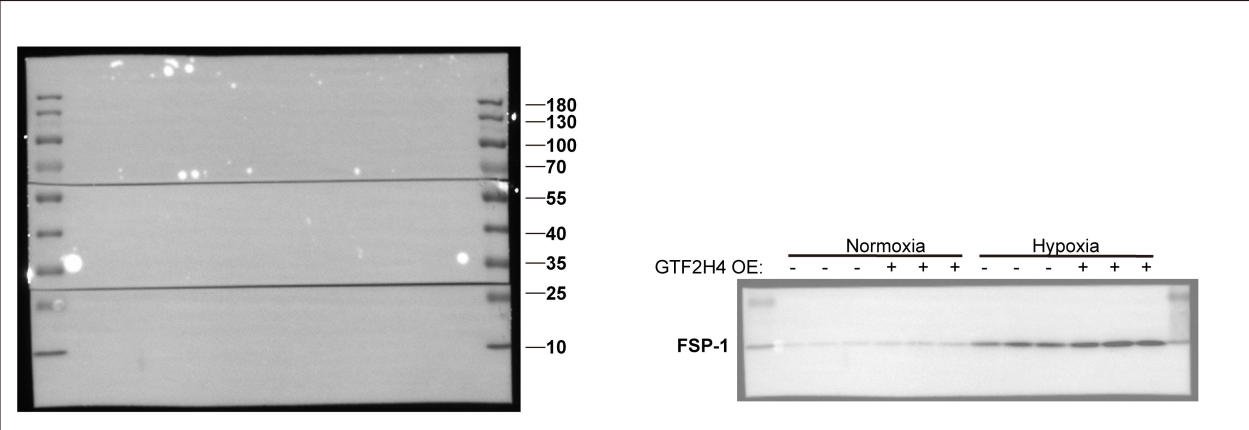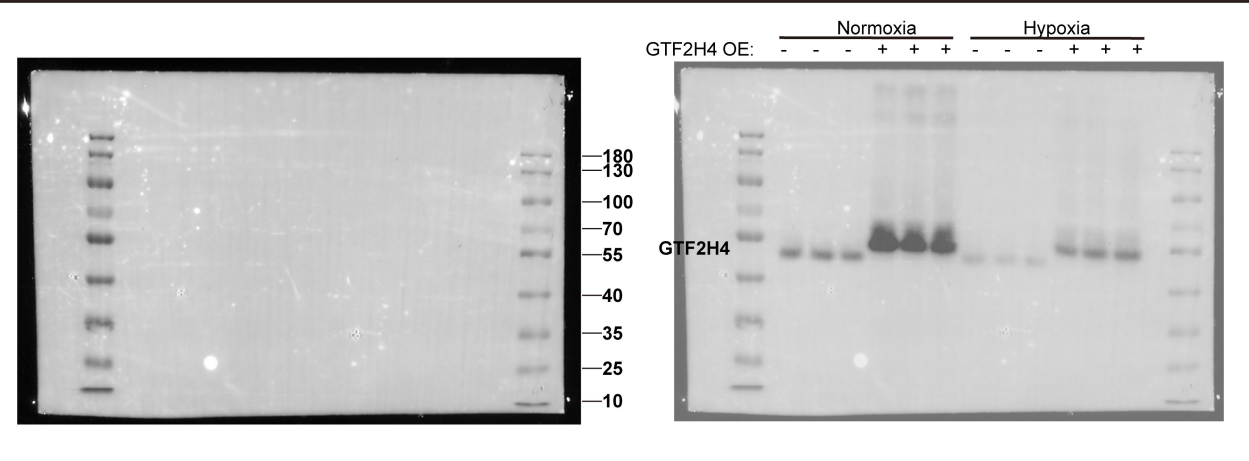



**Fig. 2k**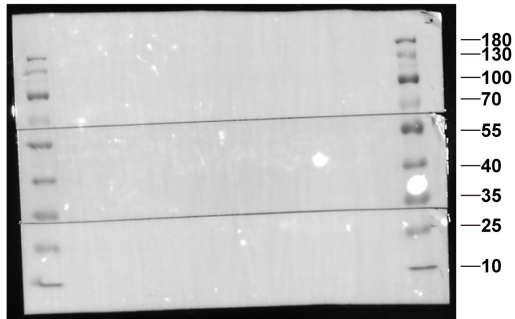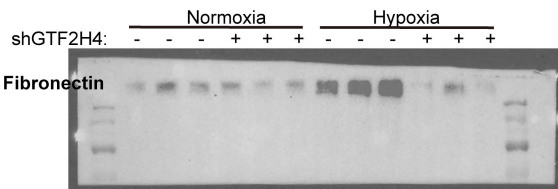

| shGTF2H4: | Normoxia |   |   | Hypoxia |   |   |
|-----------|----------|---|---|---------|---|---|
|           | -        | - | + | -       | - | + |

VE-Cad

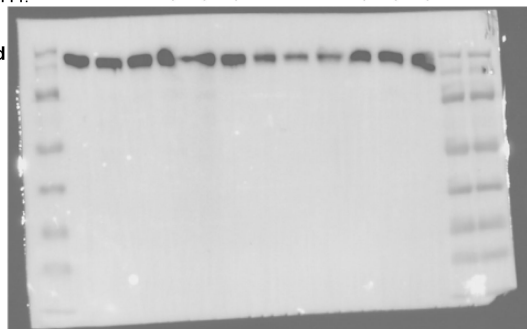

| shGTF2H4: | Normoxia |   |   | Hypoxia |   |   |
|-----------|----------|---|---|---------|---|---|
|           | -        | - | + | -       | - | + |

CD31

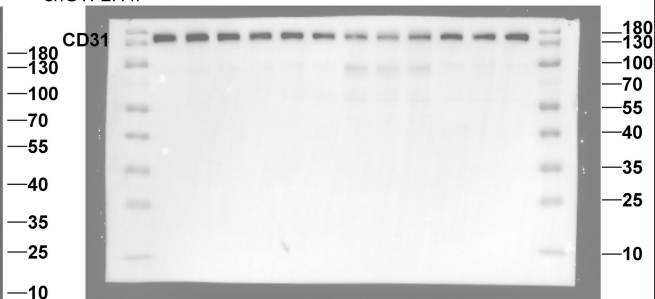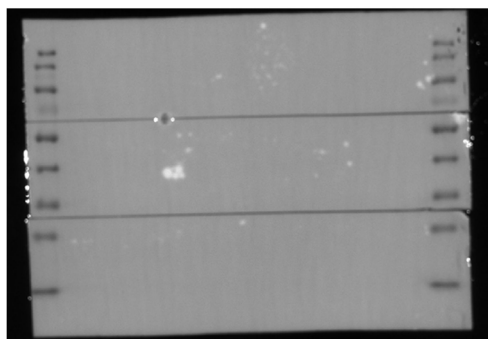

| shGTF2H4: | Normoxia |   |   | Hypoxia |   |   |
|-----------|----------|---|---|---------|---|---|
|           | -        | - | + | -       | - | + |

 $\alpha$ -SMA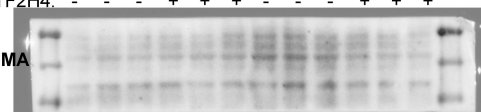

FSP-1

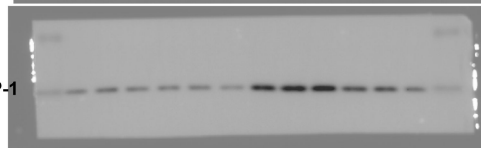



**Fig. 3g**

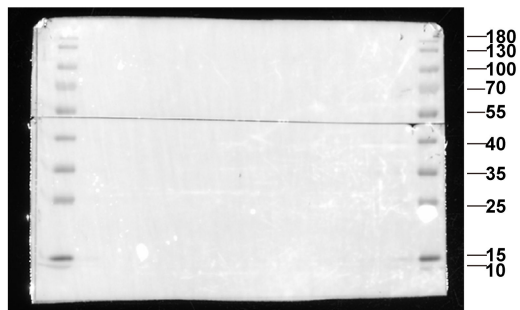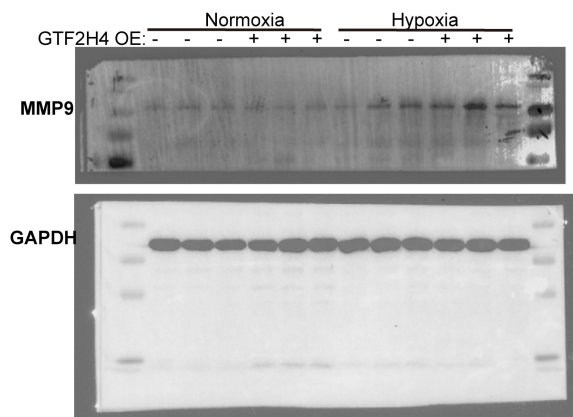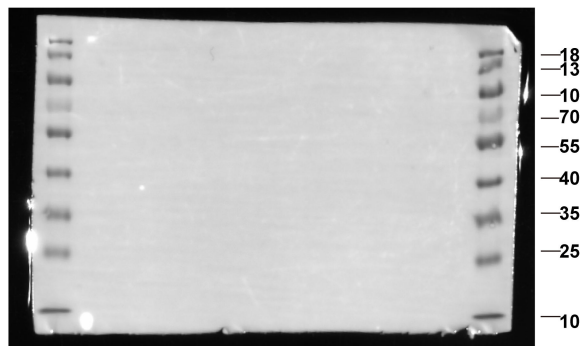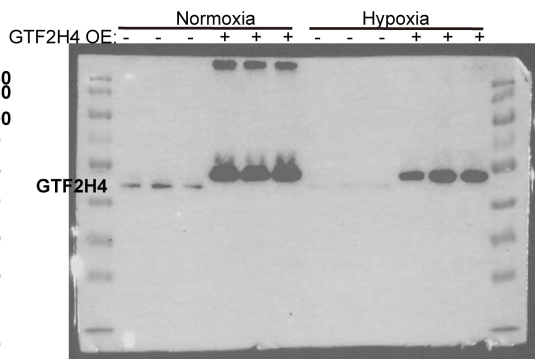

**Fig. 3h**

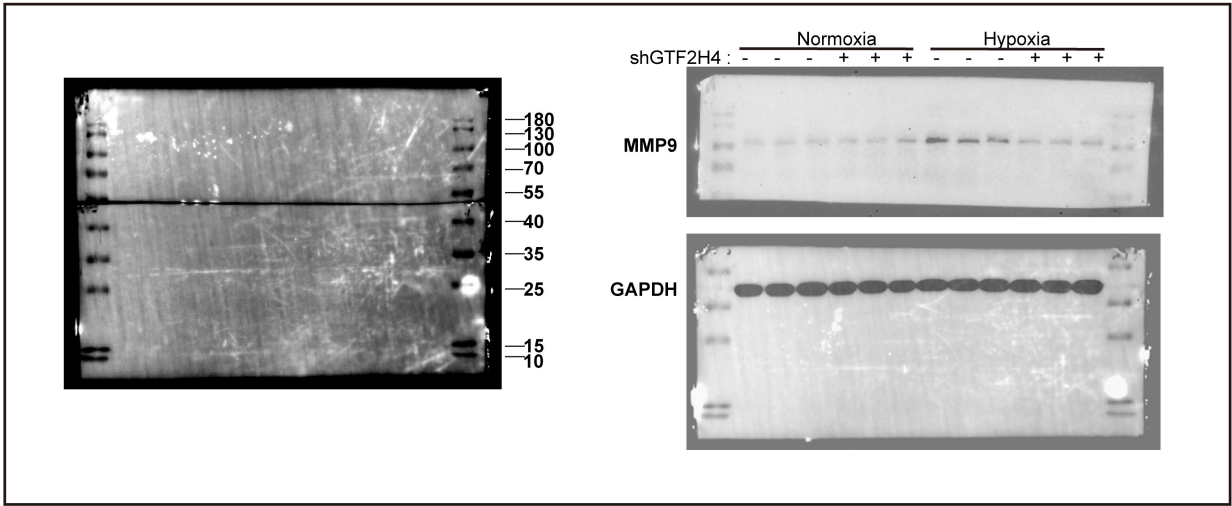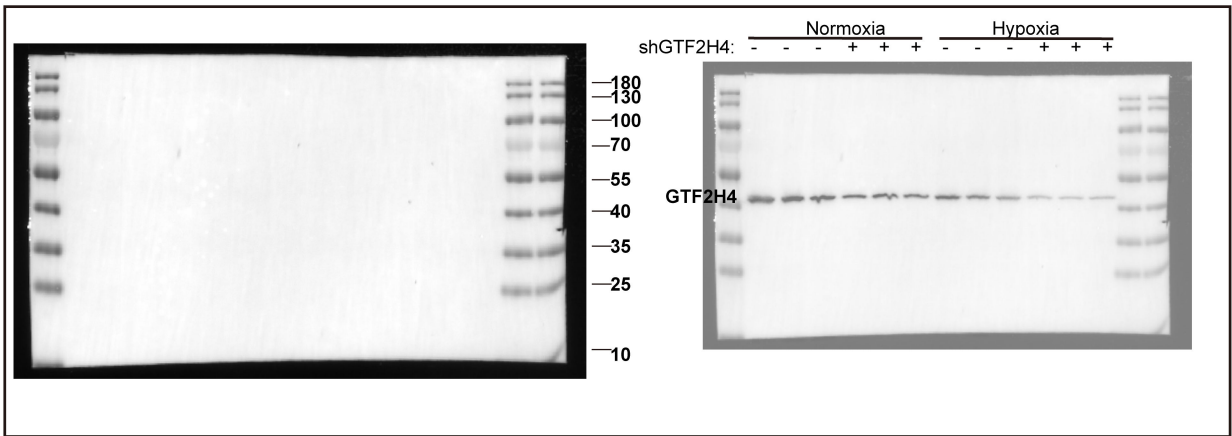

**Fig. 4e**

**Input**

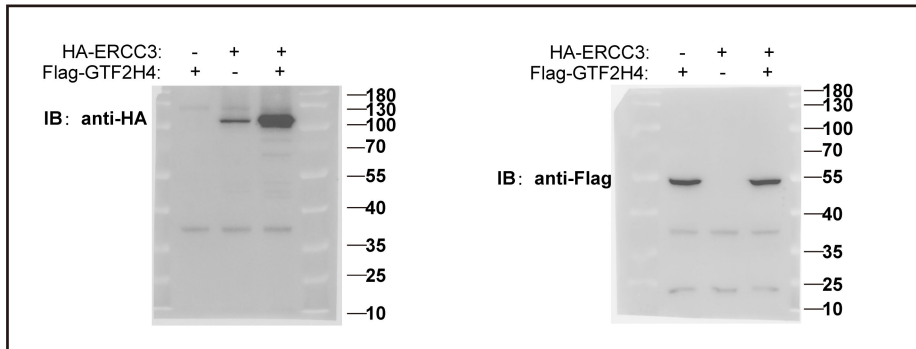

**Output**

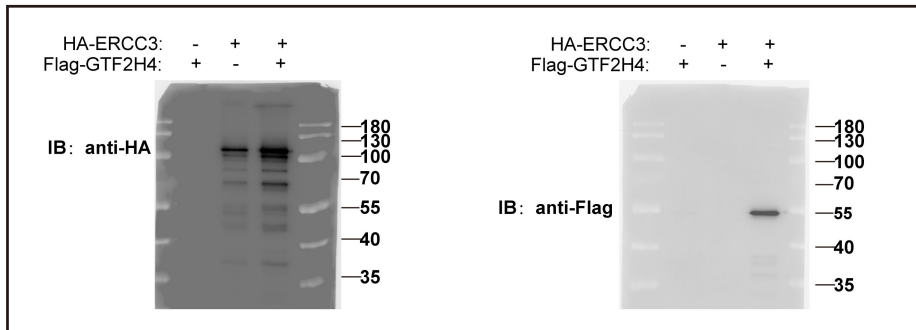

**Fig. 4g**

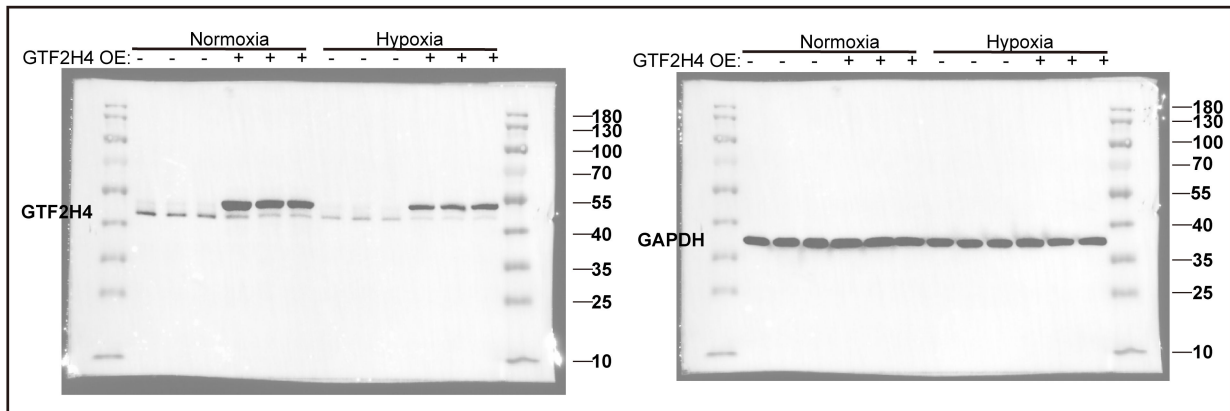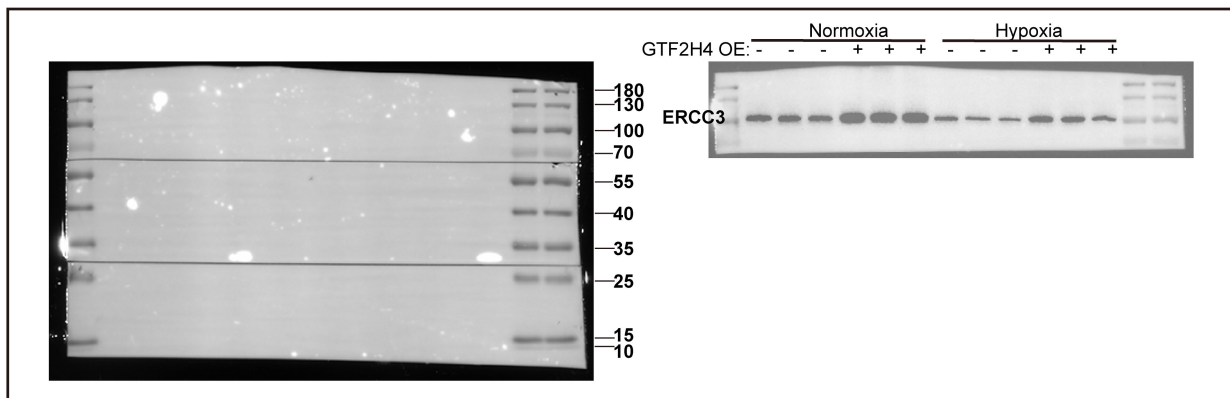

Fig. 4h

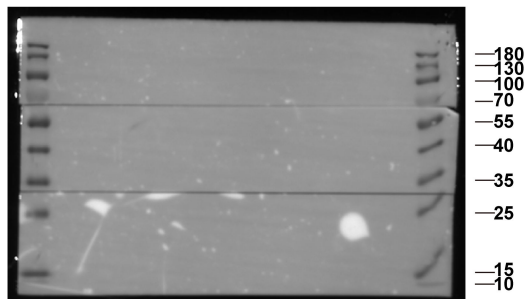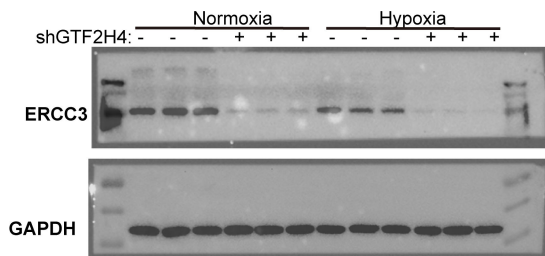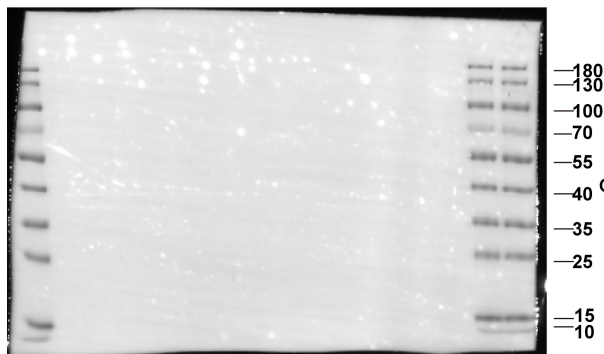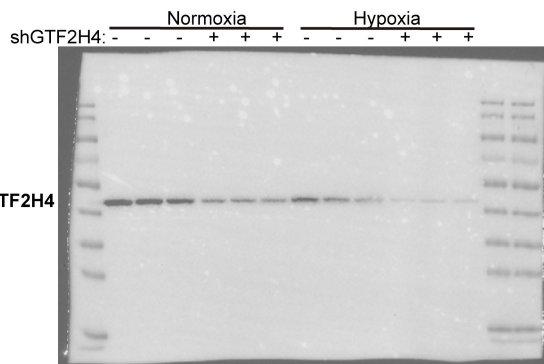

Fig. 4i

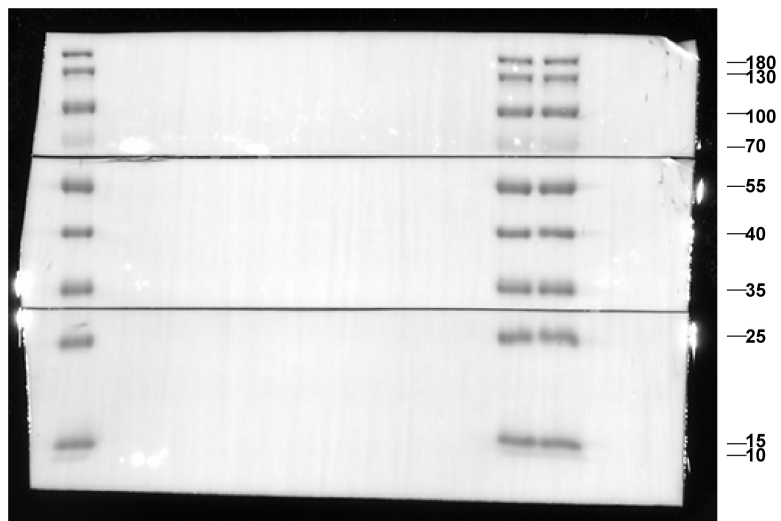

GTF2H4 OE: - + - + - + - +  
CHX+MG132: - - 4h 4h 6h 6h 12h 12h

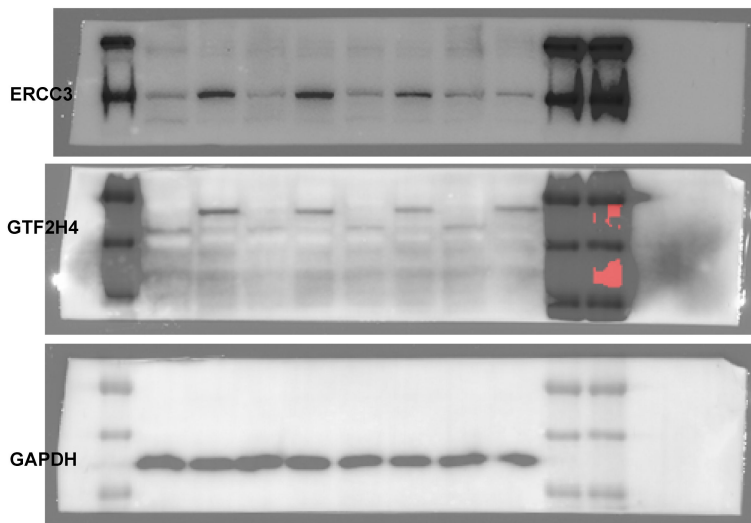



Fig. 4i Continued

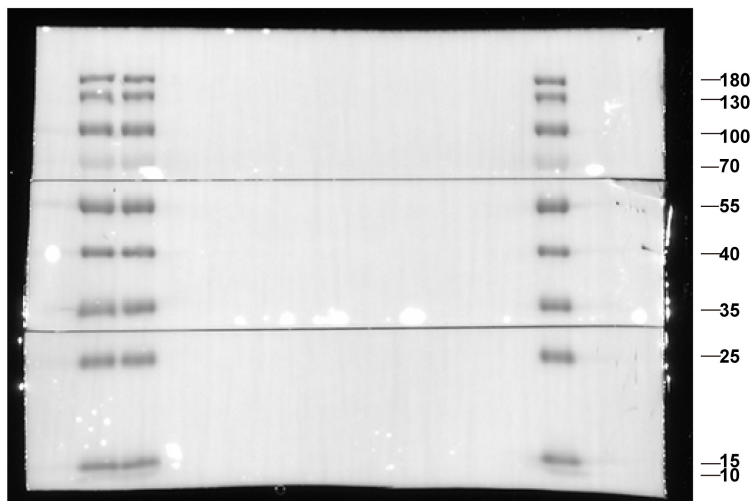

|            |   |   |    |    |    |    |     |     |
|------------|---|---|----|----|----|----|-----|-----|
| GTF2H4 OE: | - | + | -  | +  | -  | +  | -   | +   |
| CHX+3MA:   | - | - | 4h | 4h | 6h | 6h | 12h | 12h |

ERCC3

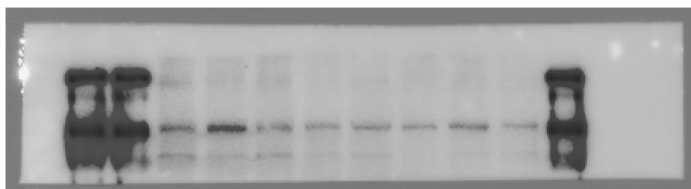

GTF2H4

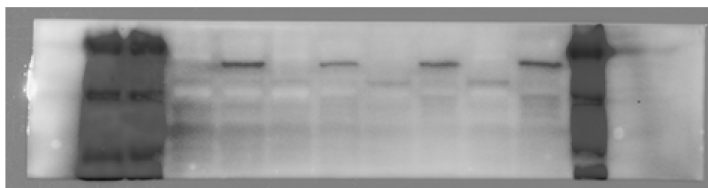

GAPDH

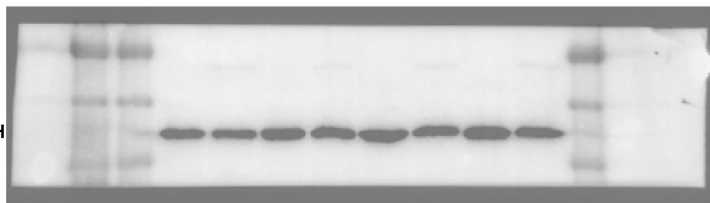



Fig. 4j Continued

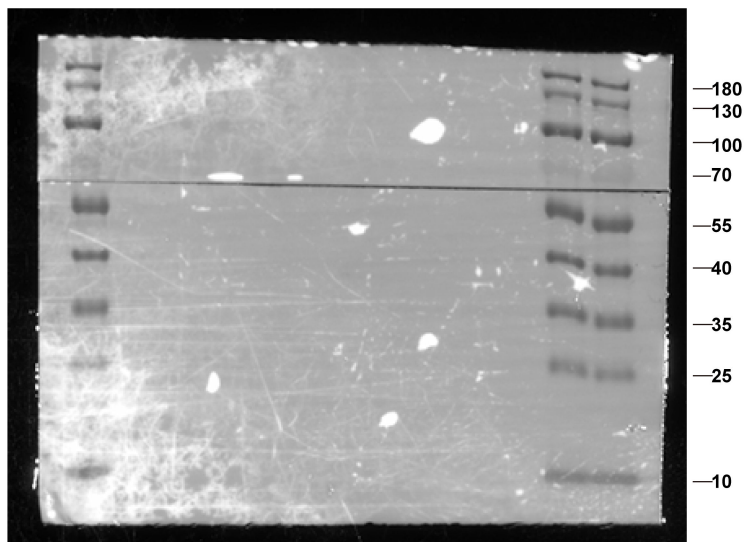

shGTF2H4: - + - + - + - +  
CHX+3MA: - - 4h 4h 6h 6h 12h 12h

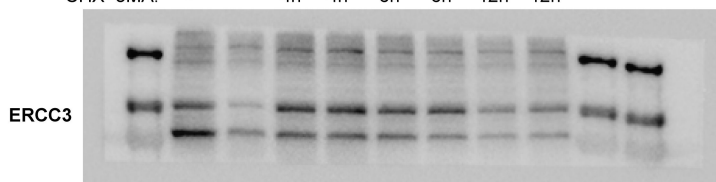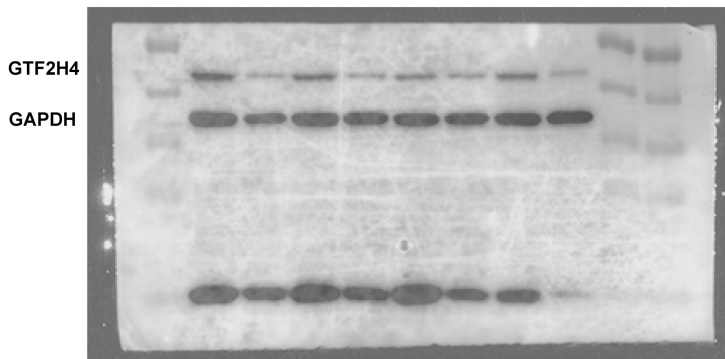

**Fig. 5a**

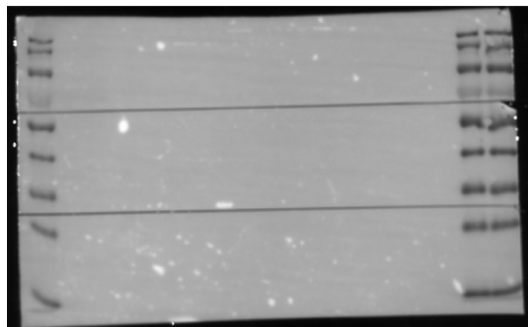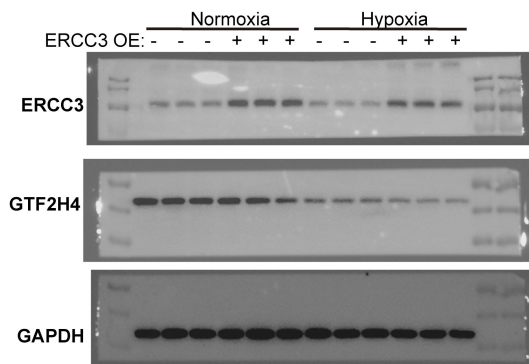

**Fig. 5b**

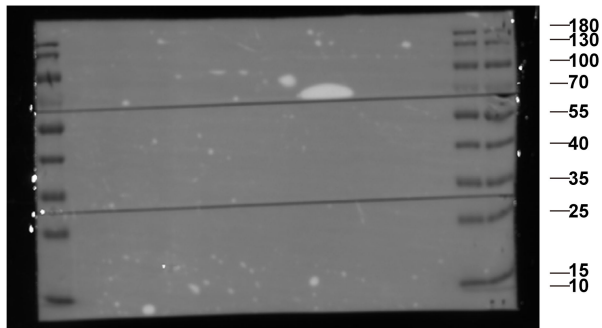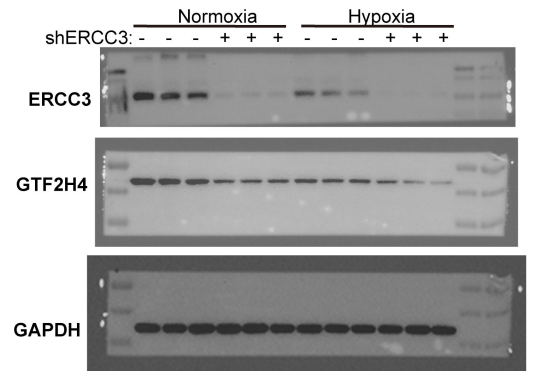

**Fig. 5g**

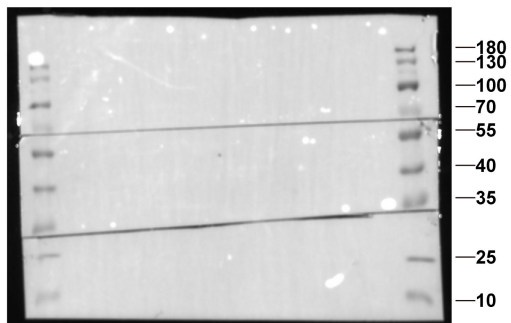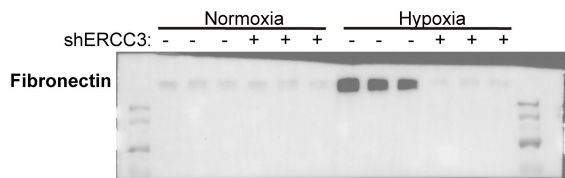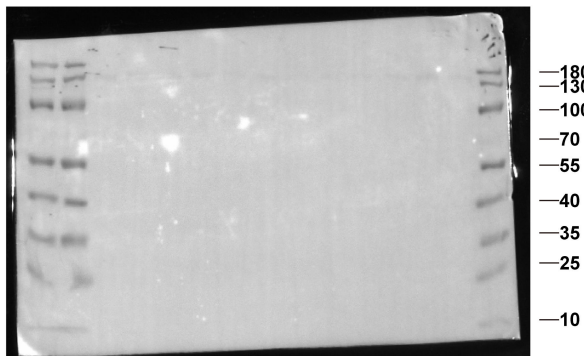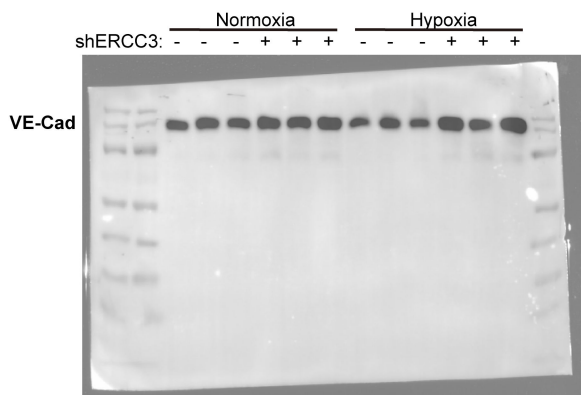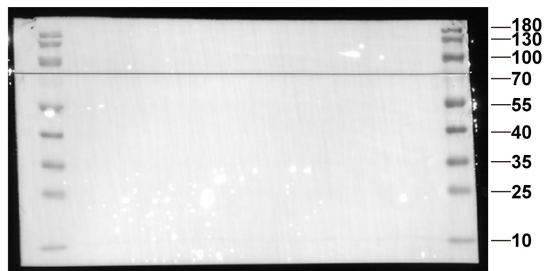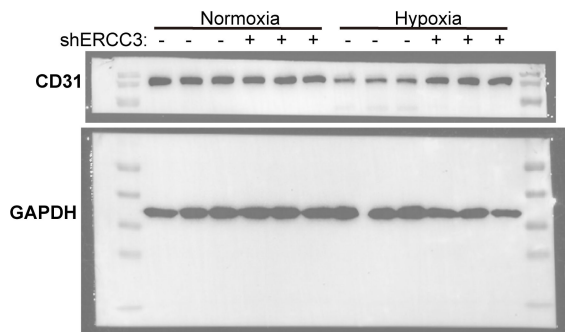

**Fig. 5g Continued**

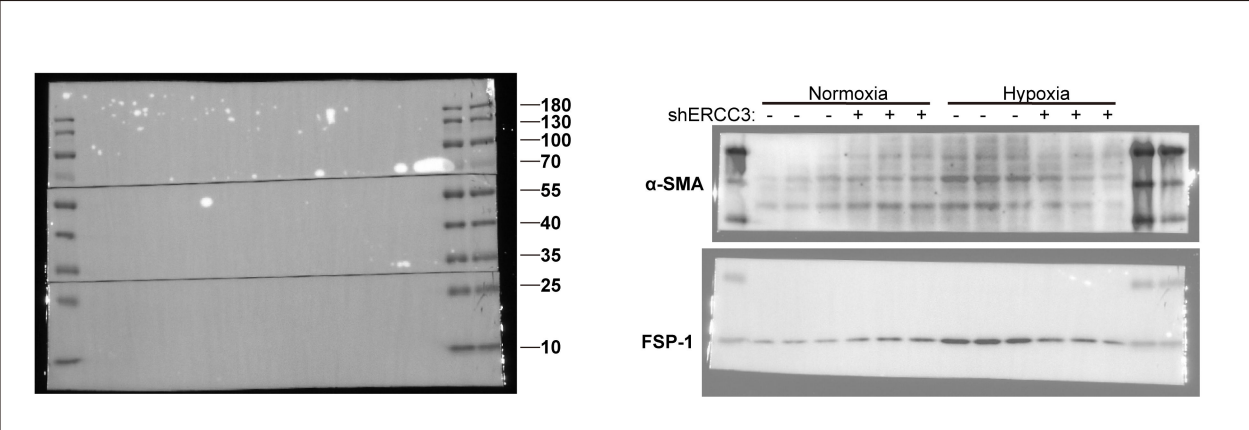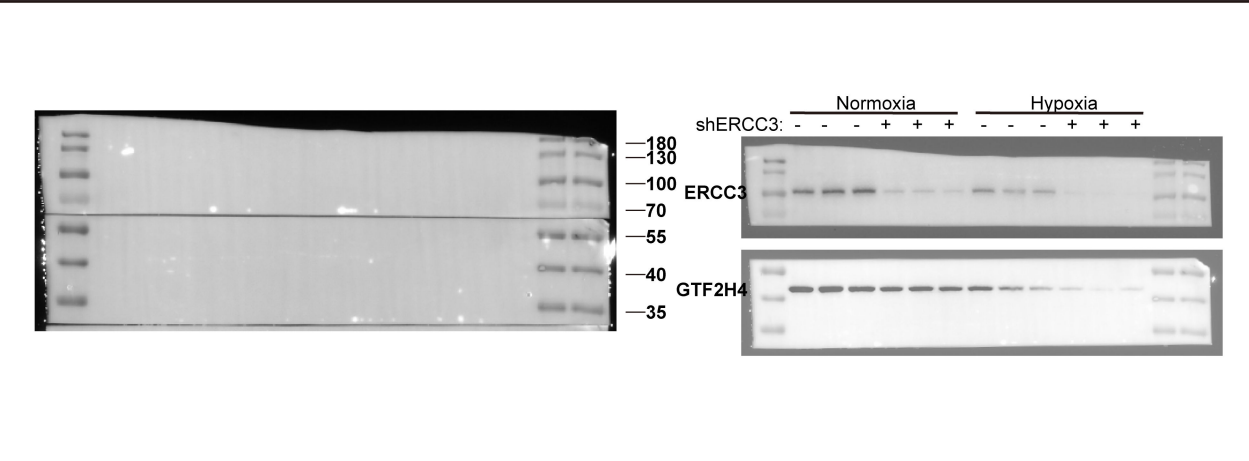

**Fig. 5I**

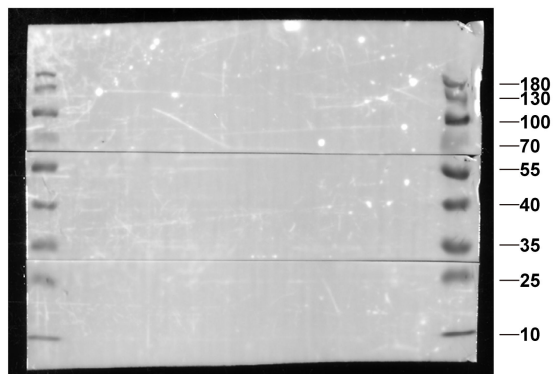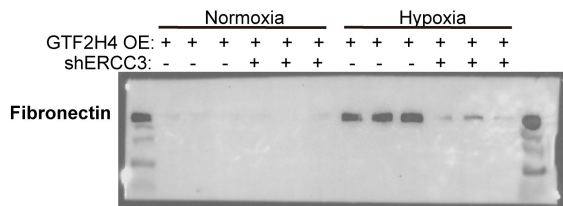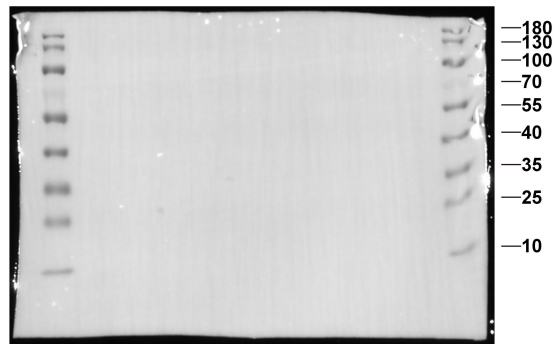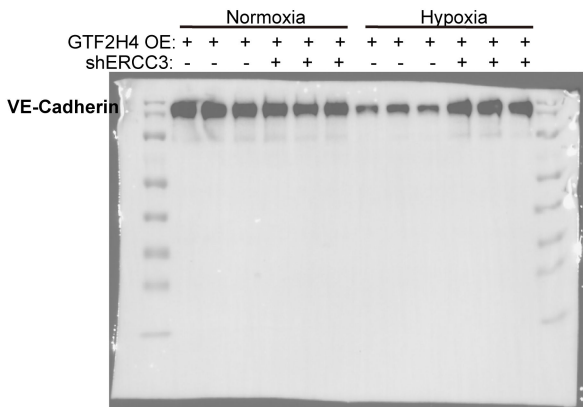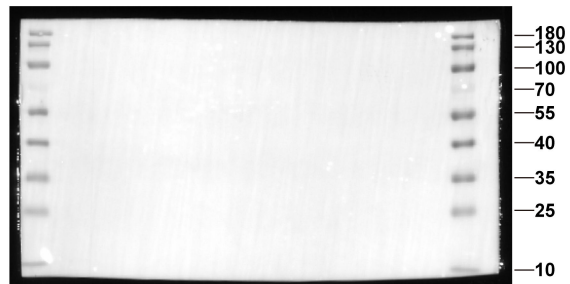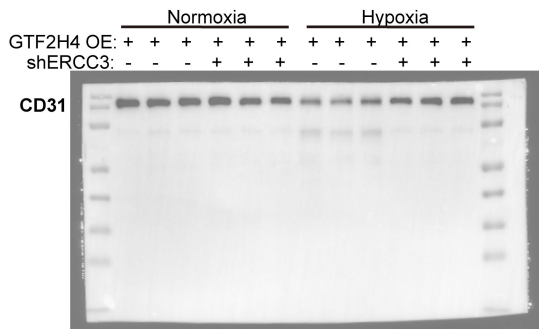



**Fig. 5I Continued**

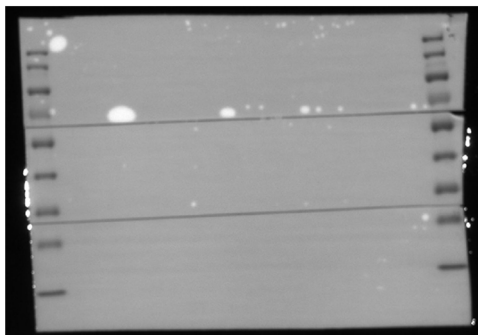

|            | Normoxia |   |   |   |   |   | Hypoxia |   |   |   |   |   |
|------------|----------|---|---|---|---|---|---------|---|---|---|---|---|
| GTF2H4 OE: | +        | + | + | + | + | + | +       | + | + | + | + | + |
| shERCC3:   | -        | - | - | + | + | + | -       | - | - | + | + | + |

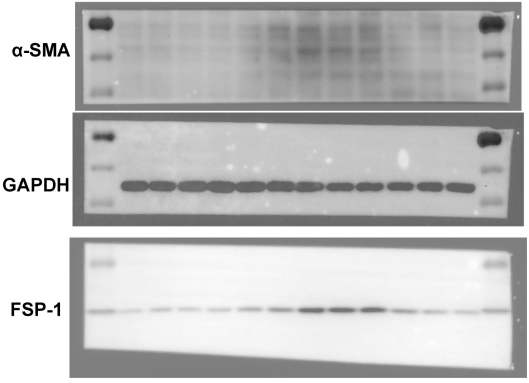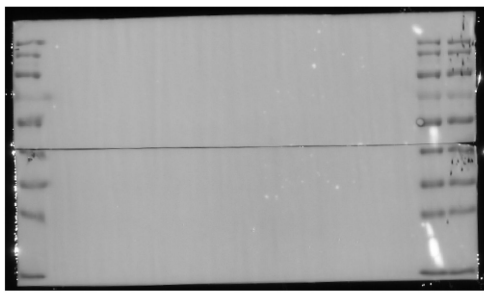

|            | Normoxia |   |   |   |   |   | Hypoxia |   |   |   |   |   |
|------------|----------|---|---|---|---|---|---------|---|---|---|---|---|
| GTF2H4 OE: | +        | + | + | + | + | + | +       | + | + | + | + | + |
| shERCC3:   | -        | - | - | + | + | + | -       | - | - | + | + | + |

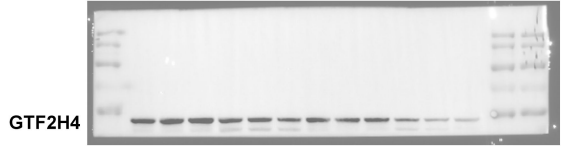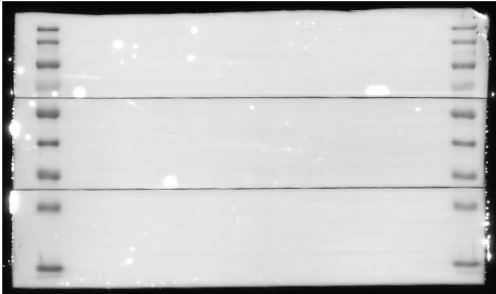

|            | Normoxia |   |   |   |   |   | Hypoxia |   |   |   |   |   |
|------------|----------|---|---|---|---|---|---------|---|---|---|---|---|
| GTF2H4 OE: | +        | + | + | + | + | + | +       | + | + | + | + | + |
| shERCC3:   | -        | - | - | + | + | + | -       | - | - | + | + | + |

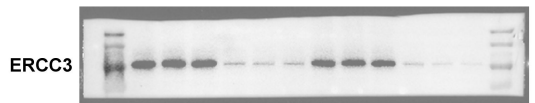

**Fig. 5m**

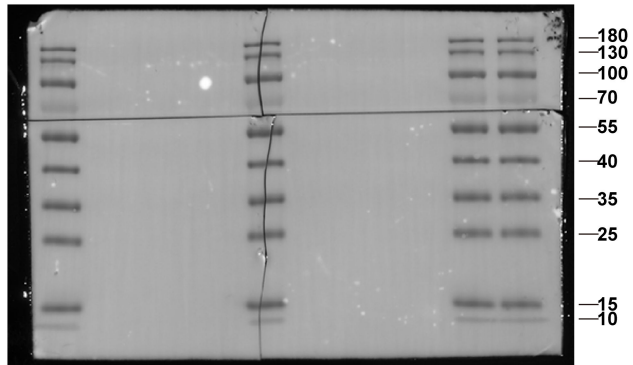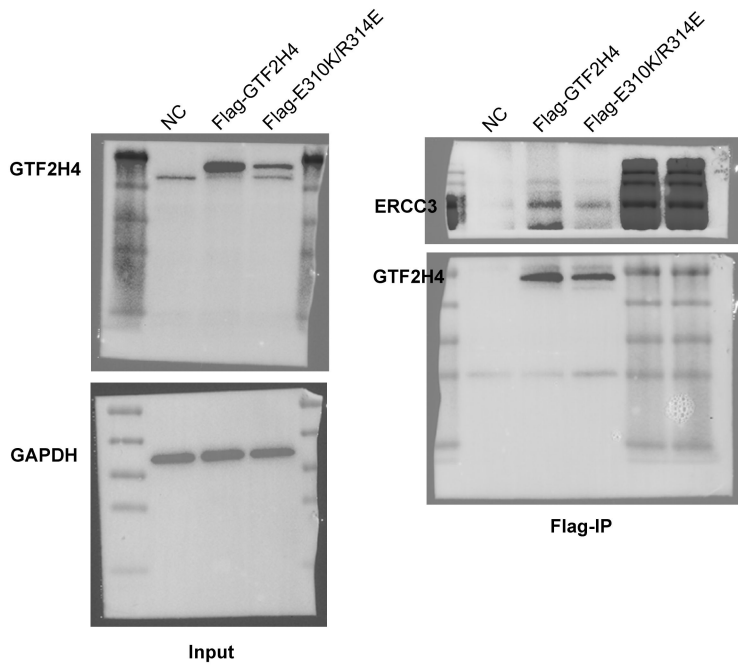

**Fig. 5n**

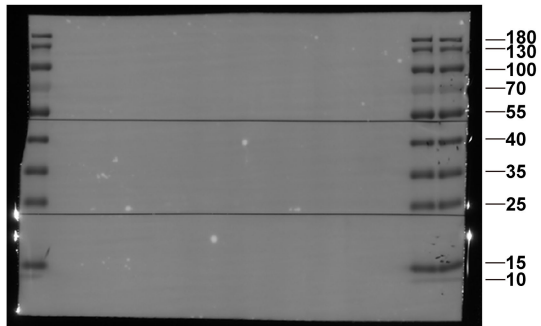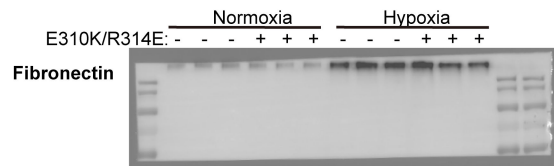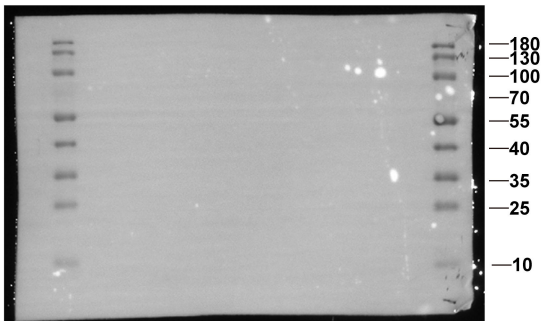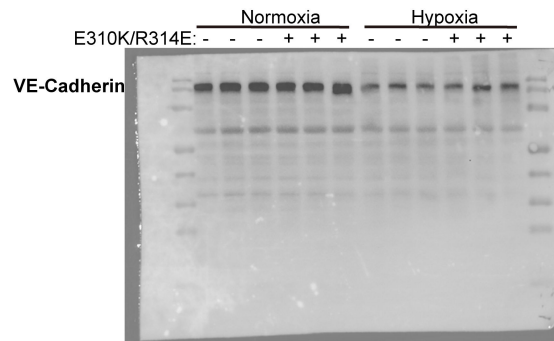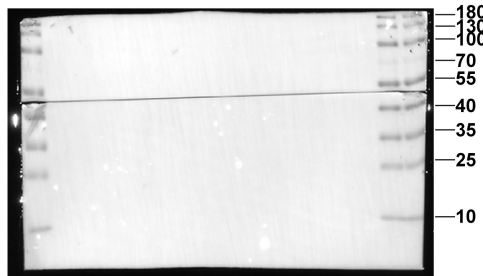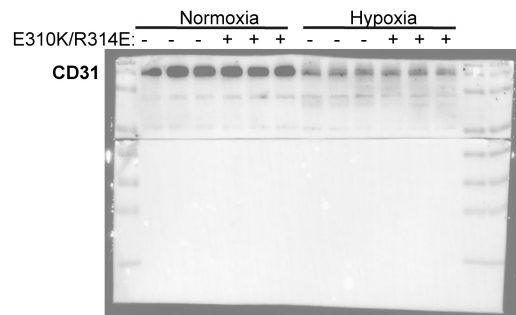

**Fig. 5n Continued**

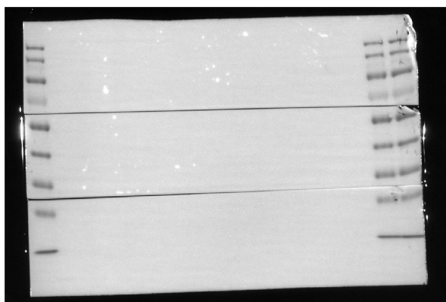

—180  
—130  
—100  
—70  
—55  
—40  
—35  
—25  
—10

E310K/R314E: Normoxia Hypoxia  
- - - + + + - - - + + +

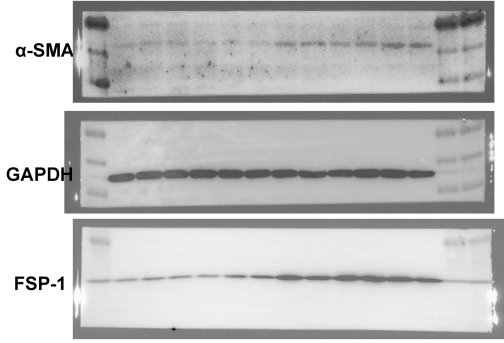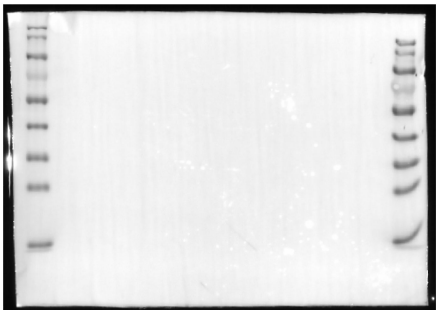

—180  
—130  
—100  
—70  
—55  
—40  
—35  
—25  
—15  
—10

E310K/R314E: Normoxia Hypoxia  
- - - + + + - - - + + +

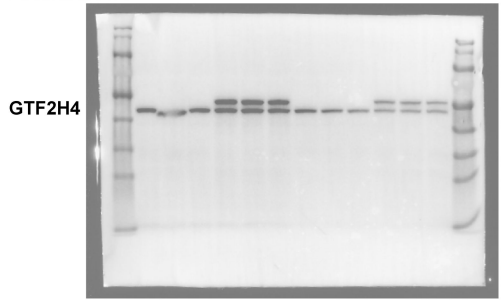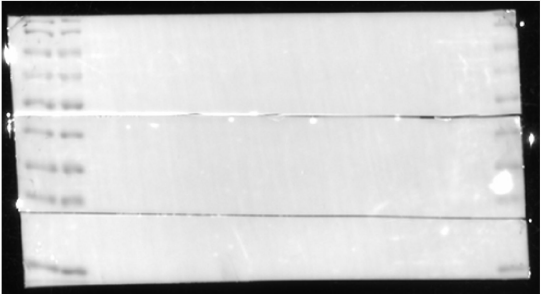

—180  
—130  
—100  
—70  
—55  
—40  
—35  
—25  
—10

E310K/R314E: Normoxia Hypoxia  
- - - + + + - - - + + +

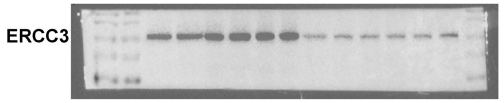

**Fig. 6h**

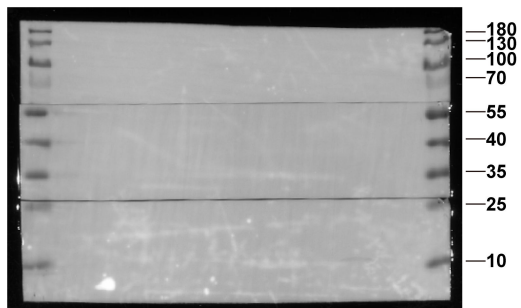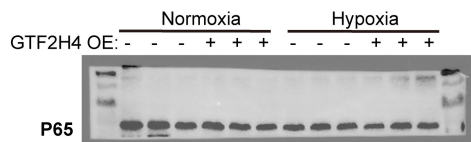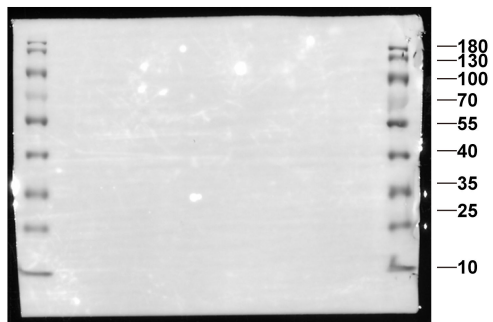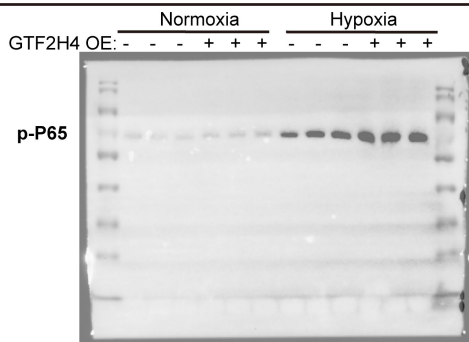

|            | Normoxia |   |   |   |   | Hypoxia |   |   |   |   |   |   |
|------------|----------|---|---|---|---|---------|---|---|---|---|---|---|
| GTF2H4 OE: | -        | - | - | + | + | +       | - | - | - | + | + | + |

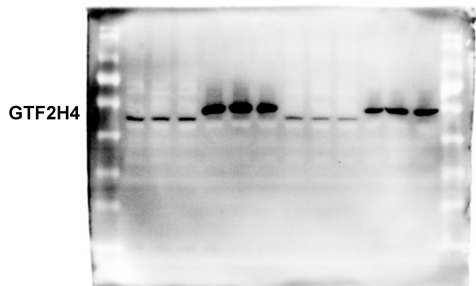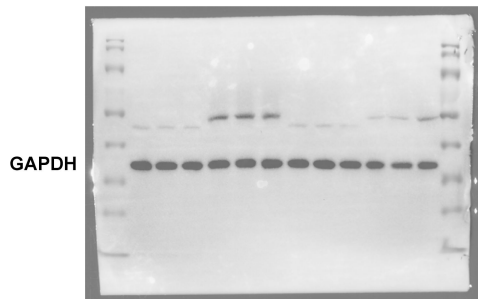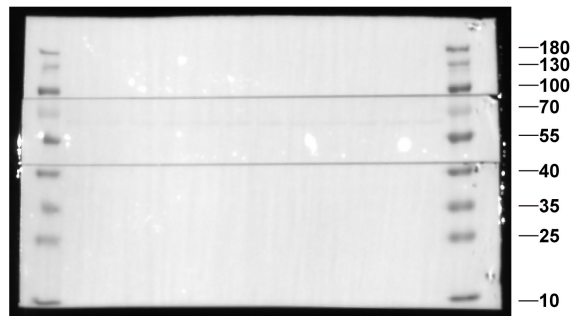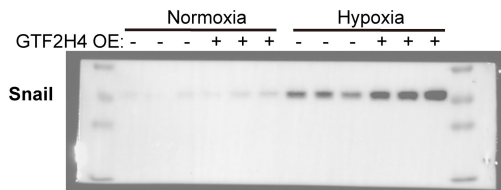

**Fig. 6i**

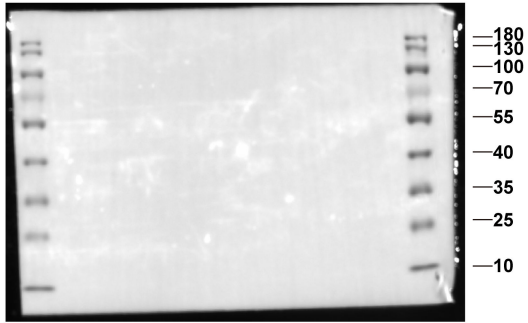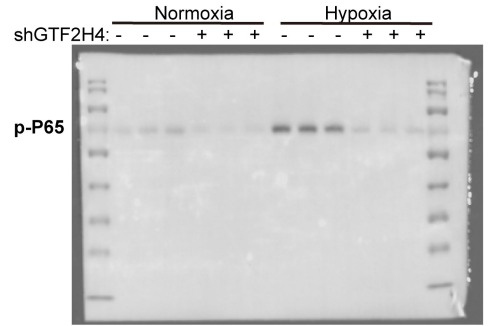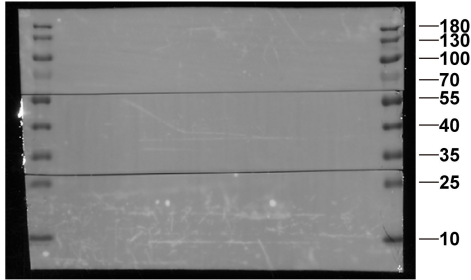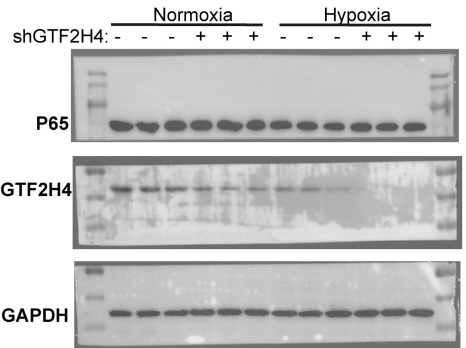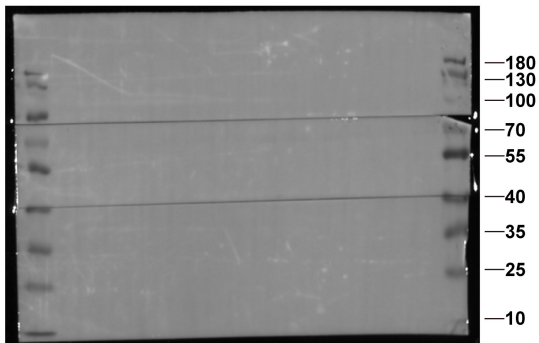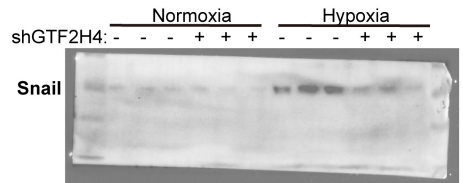

**Fig. 6j**

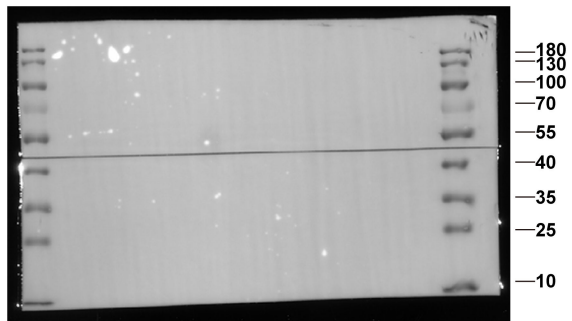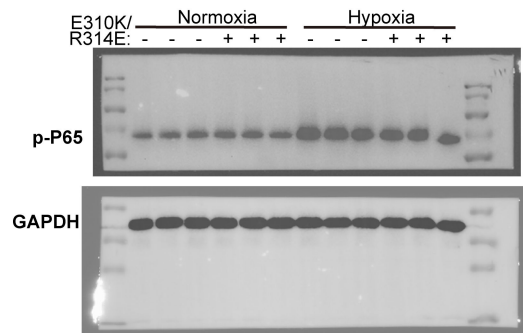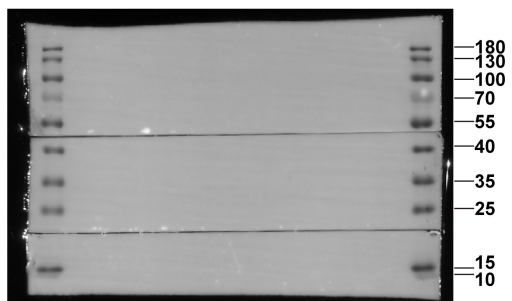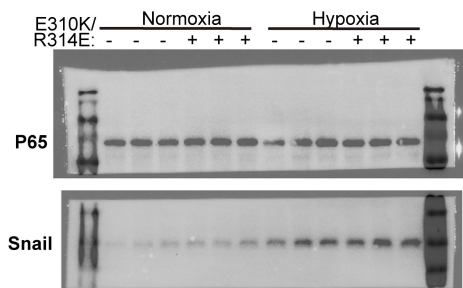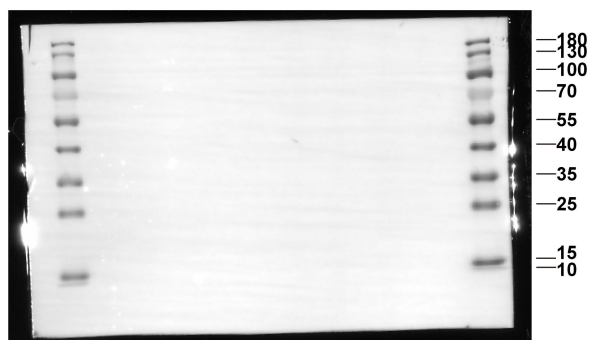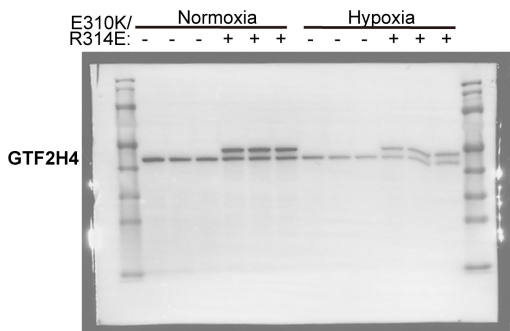

**Fig. 6I**

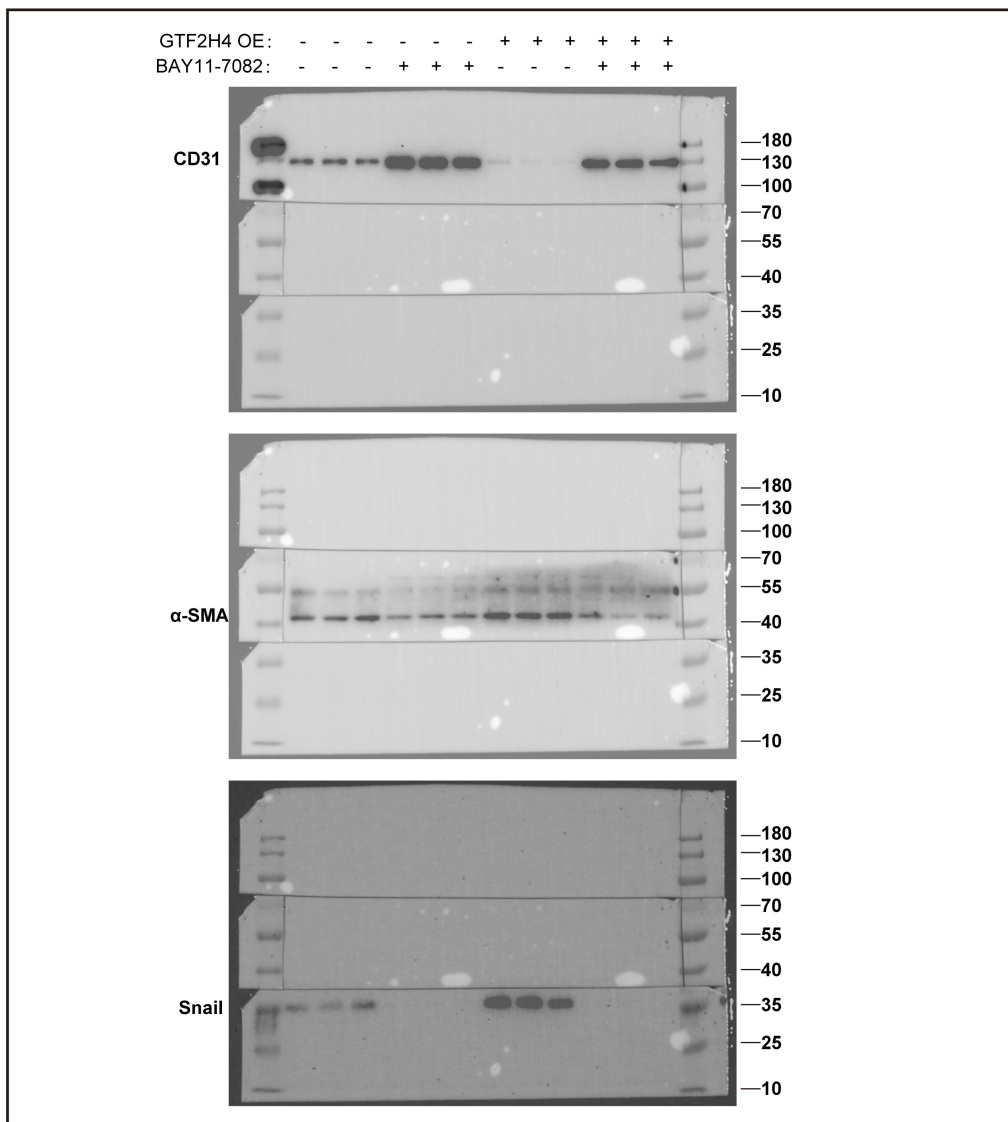



**Fig. 6I Continued**

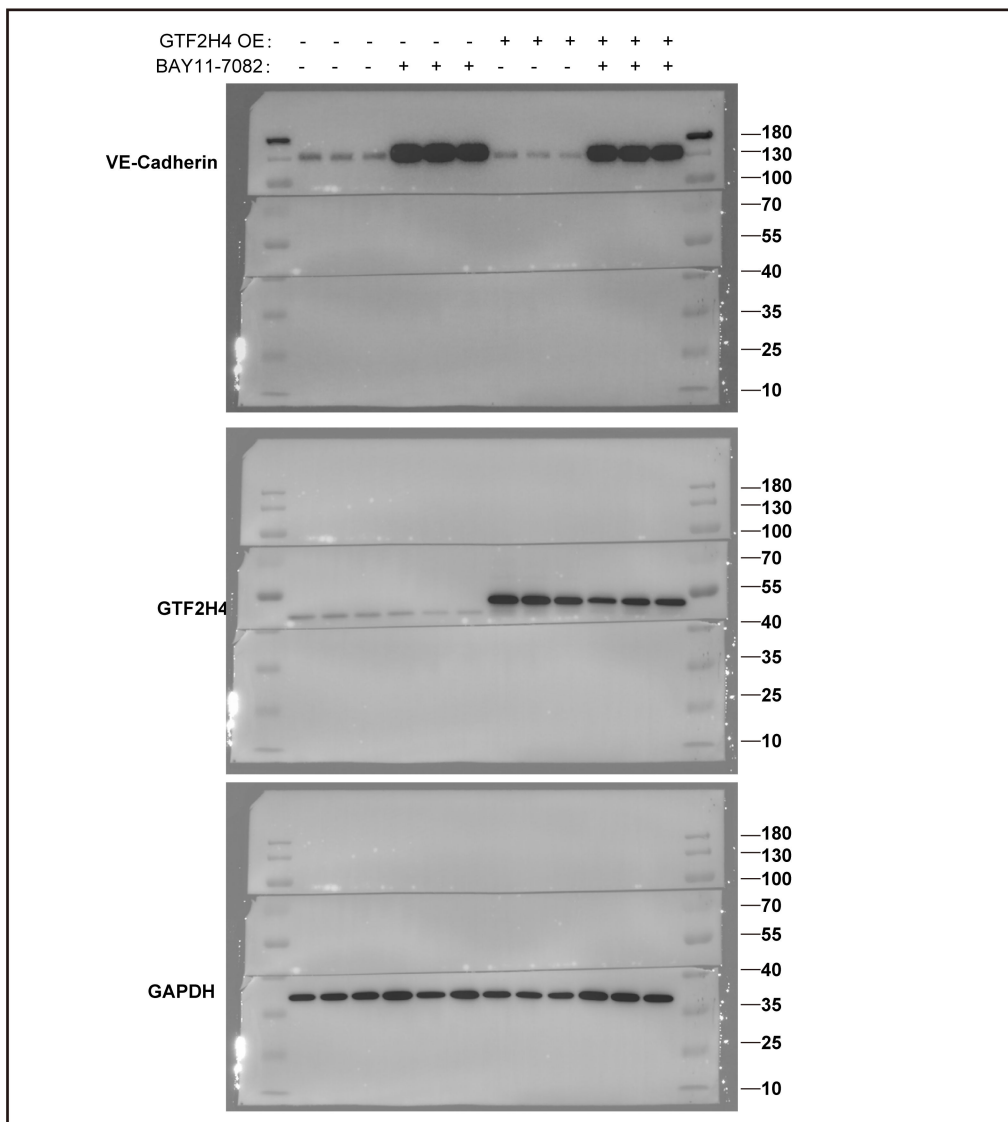

**Fig. 7e**

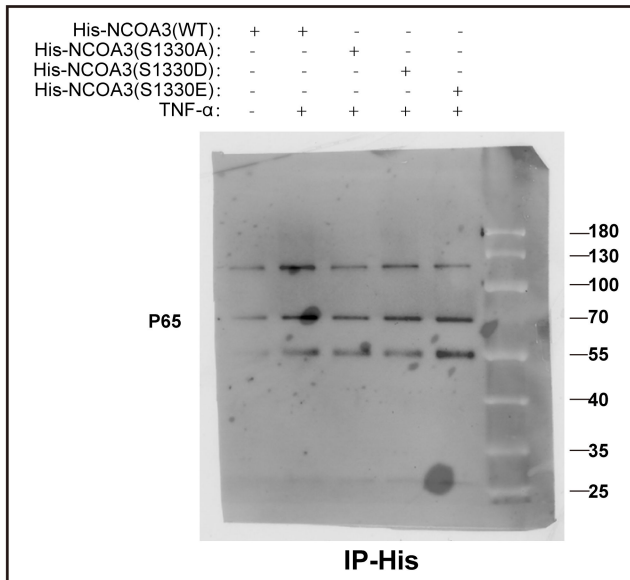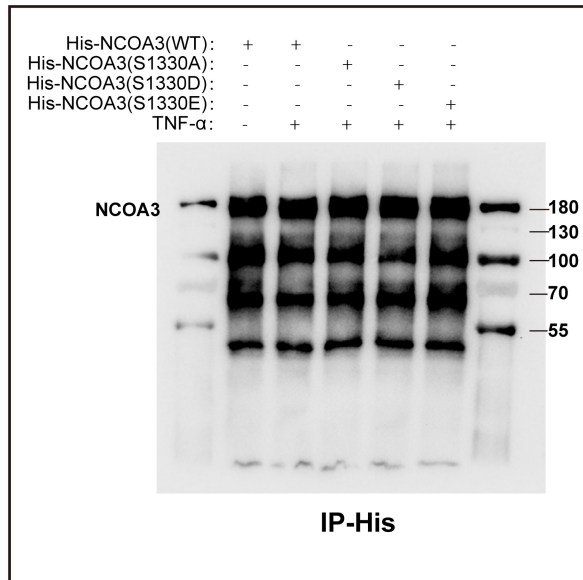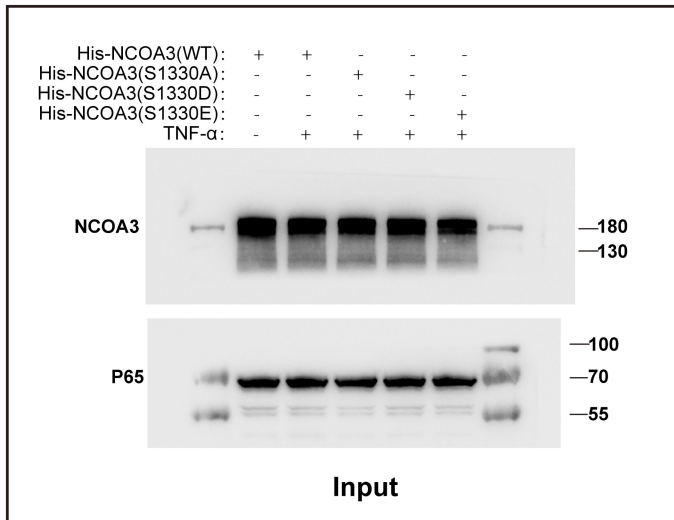

**Fig. 8b**

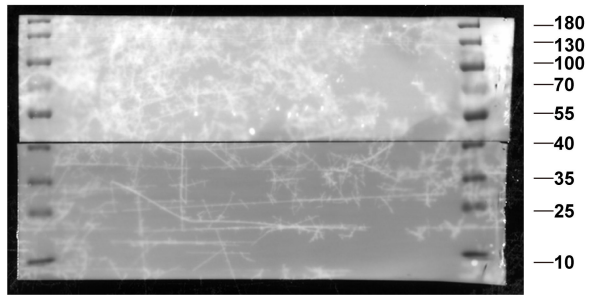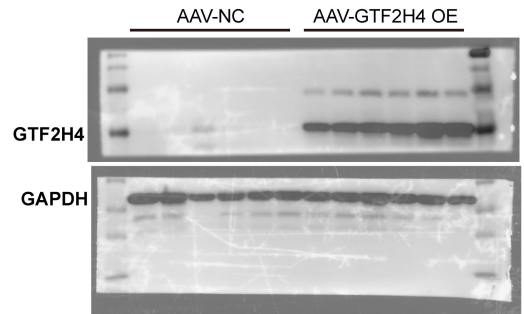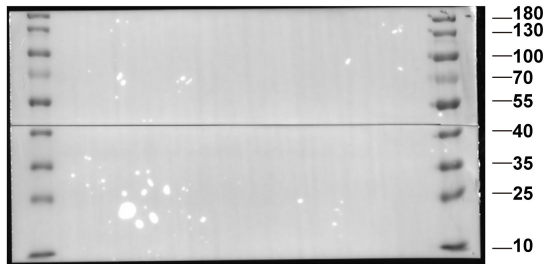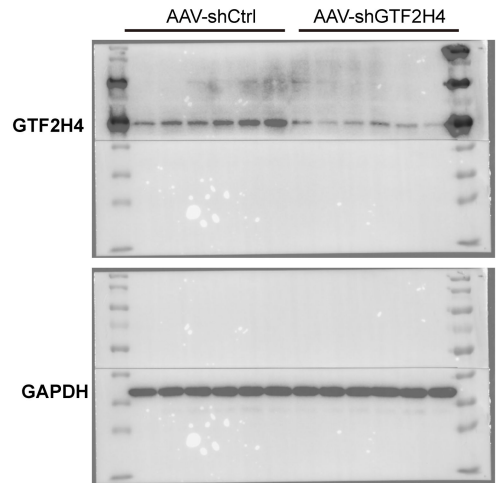

**Fig. 8i and Fig. S8g**

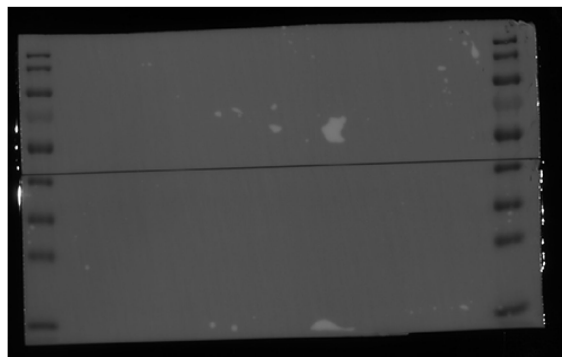

—180 Vimentin  
—130  
—100  
—70  
—55  
—40  
—35  
—25  
GTF2H4  
—15  
—10 GAPDH

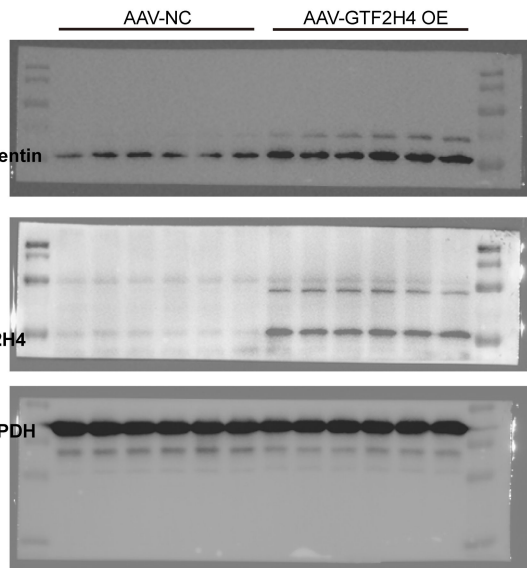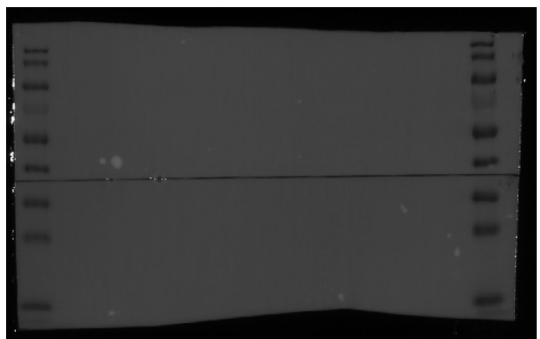

—180  
—130  
—100  
—70  
—55  
—40  
—35  
—25  
—15  
—10

GTF2H4  
 $\alpha$ -SMA  
Snail

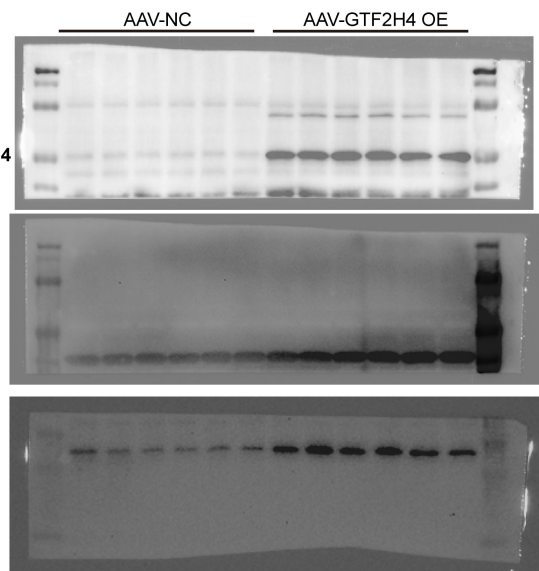

**Fig. 8i and Fig. S8g Continued**

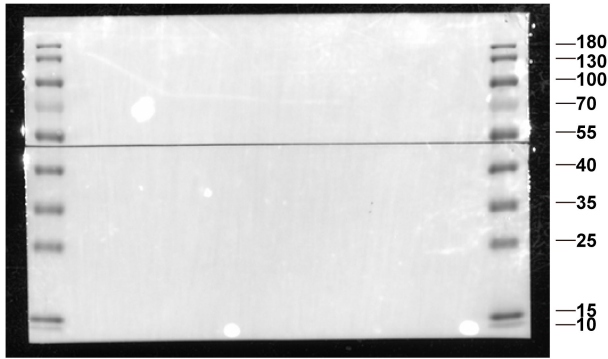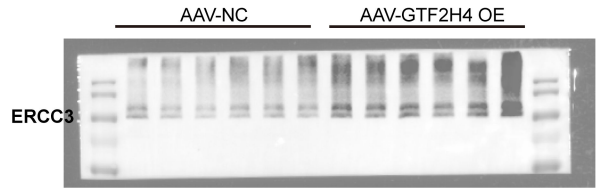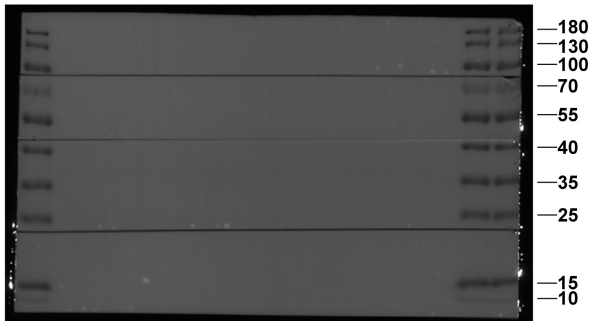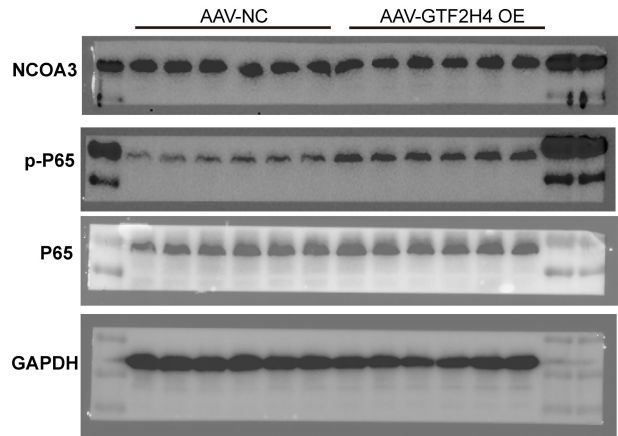

**Fig. 8j and Fig. S8h**

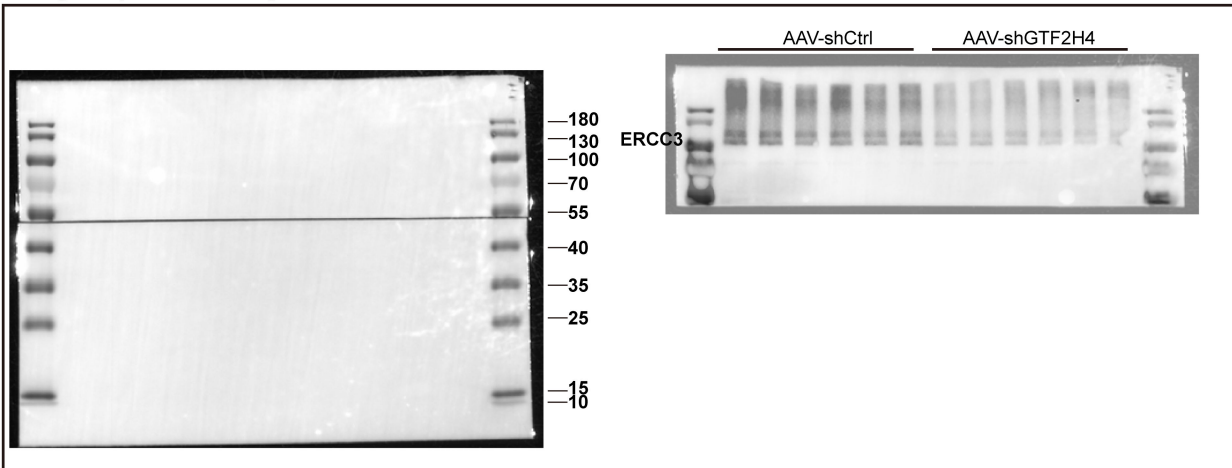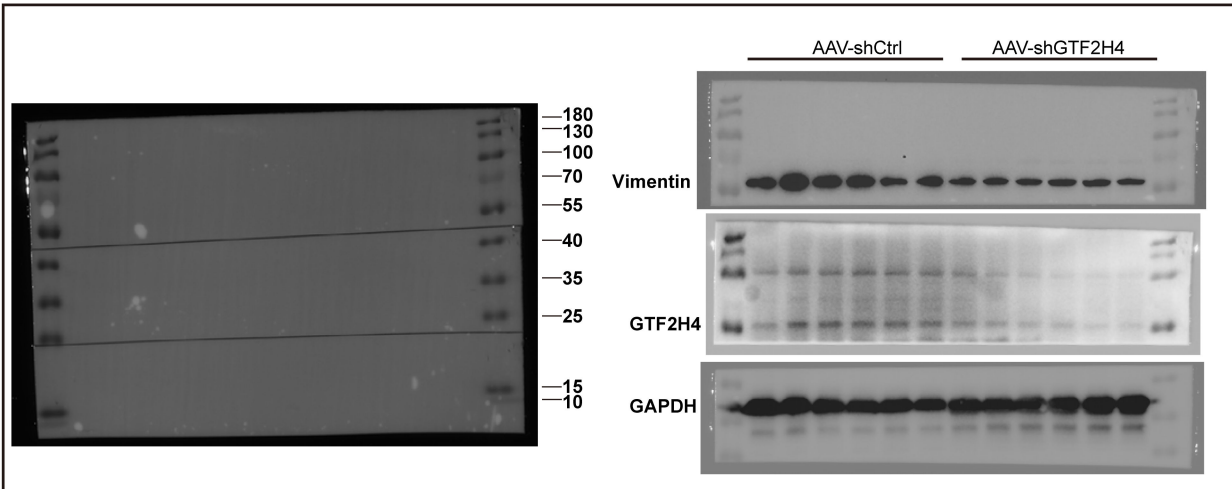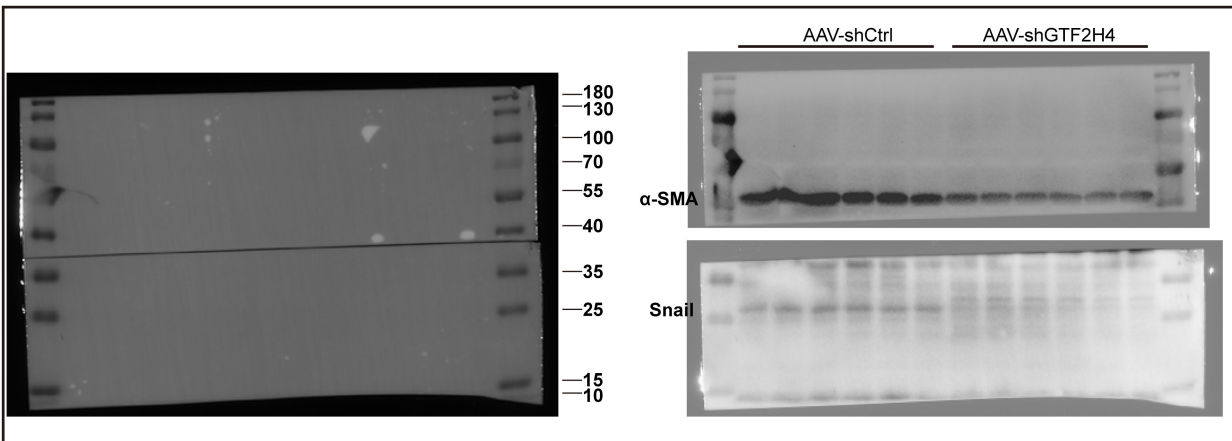

**Fig. 8j and Fig. S8h Continued**

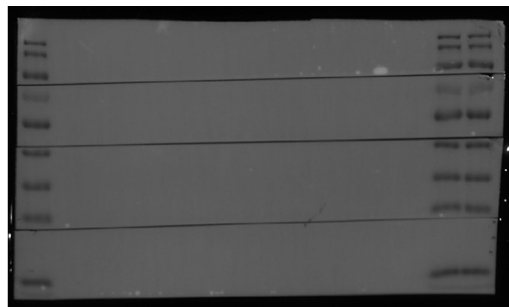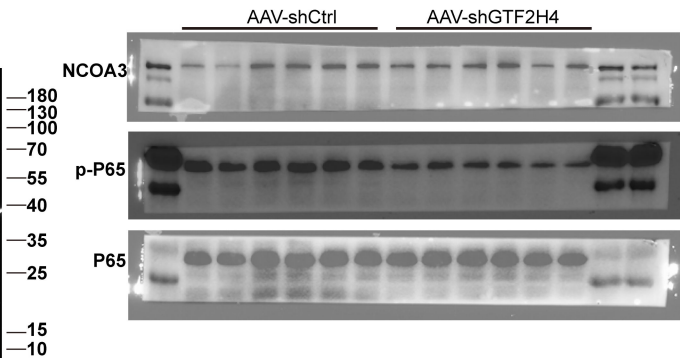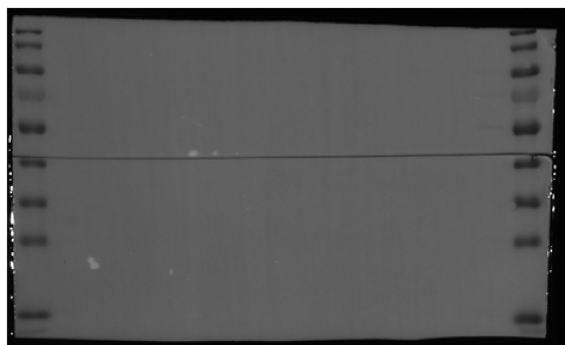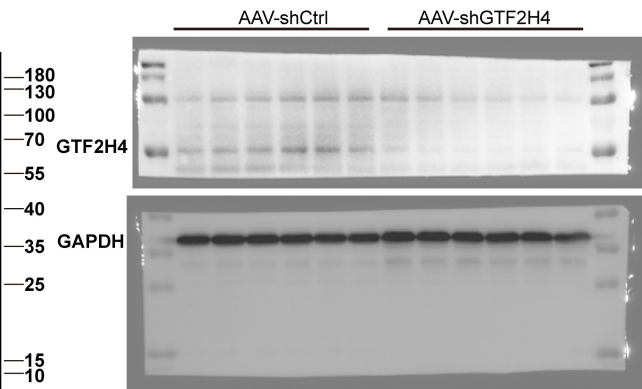

**Fig. S5c**

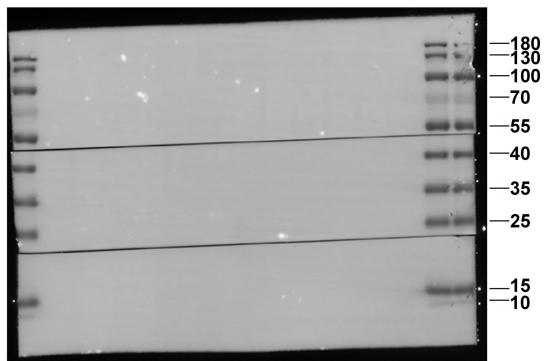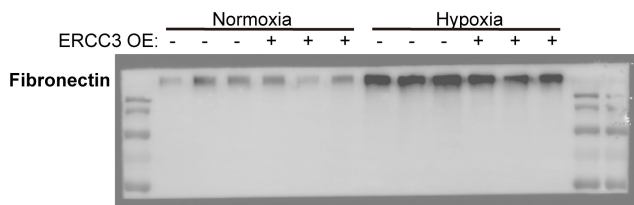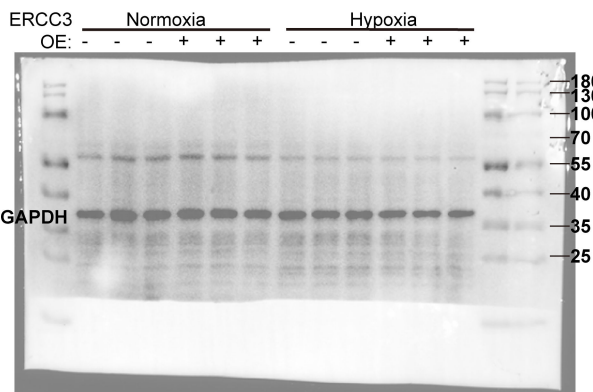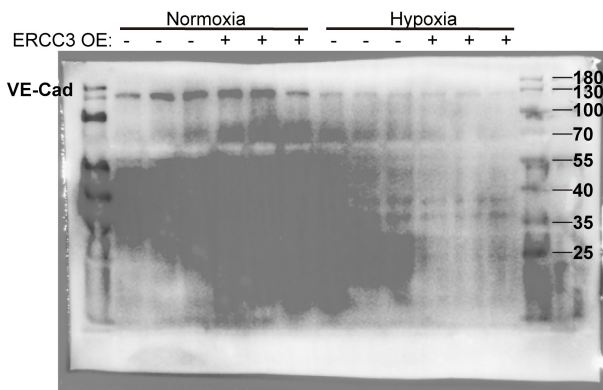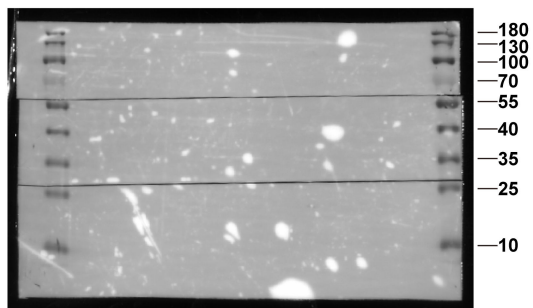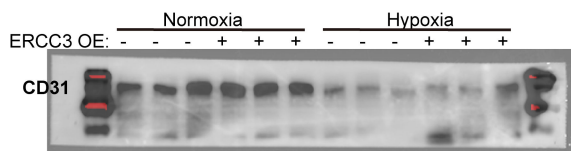



**Fig. S5c Continued**

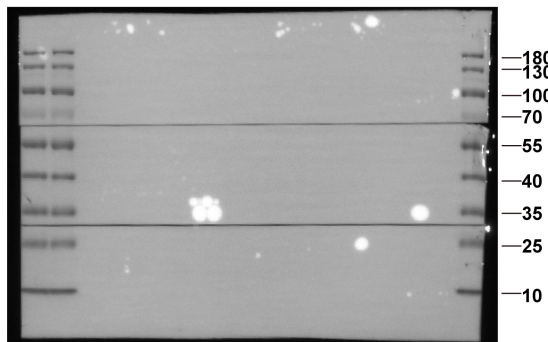

ERCC3 OE: Normoxia Hypoxia  
- - - + + + - - - + + +

$\alpha$ -SMA

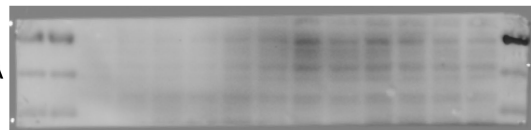

FSP-1

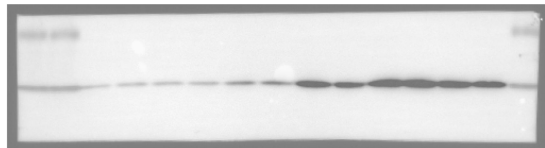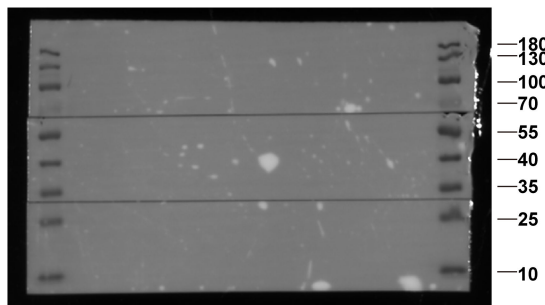

ERCC3 OE: Normoxia Hypoxia  
- - - + + + - - - + + +

ERCC3

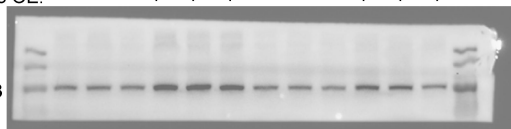

**Fig. S5e**

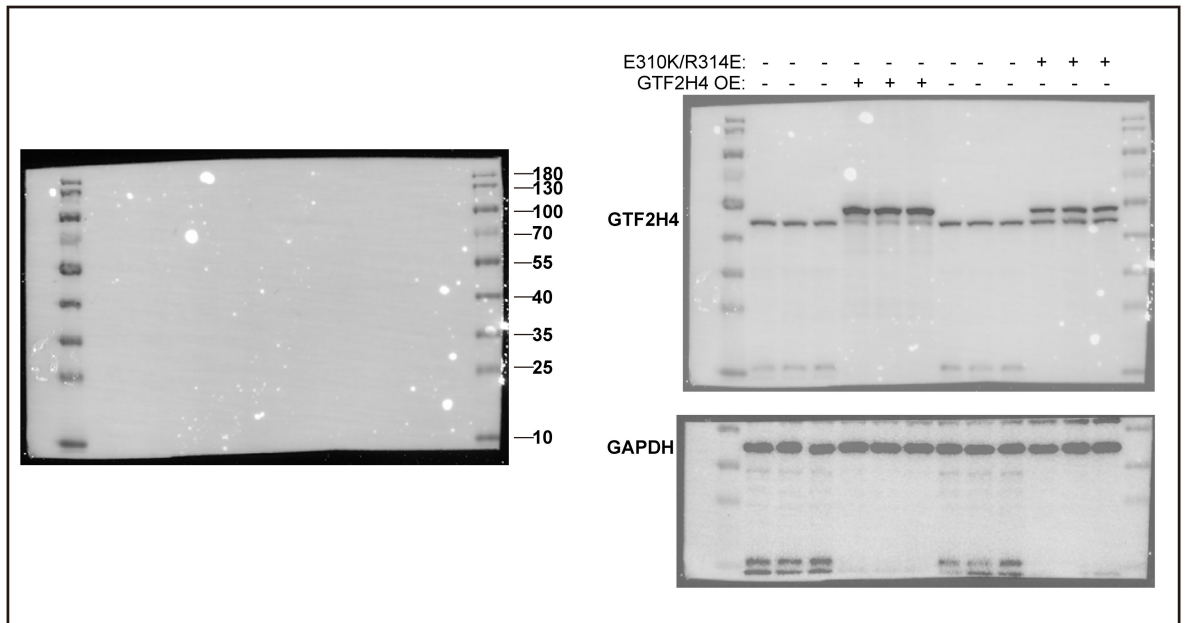

Fig. S6f

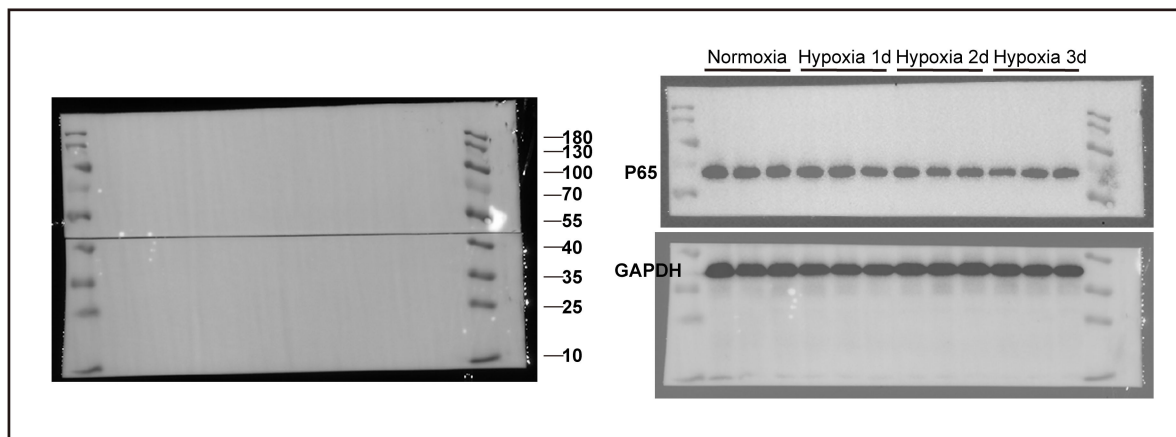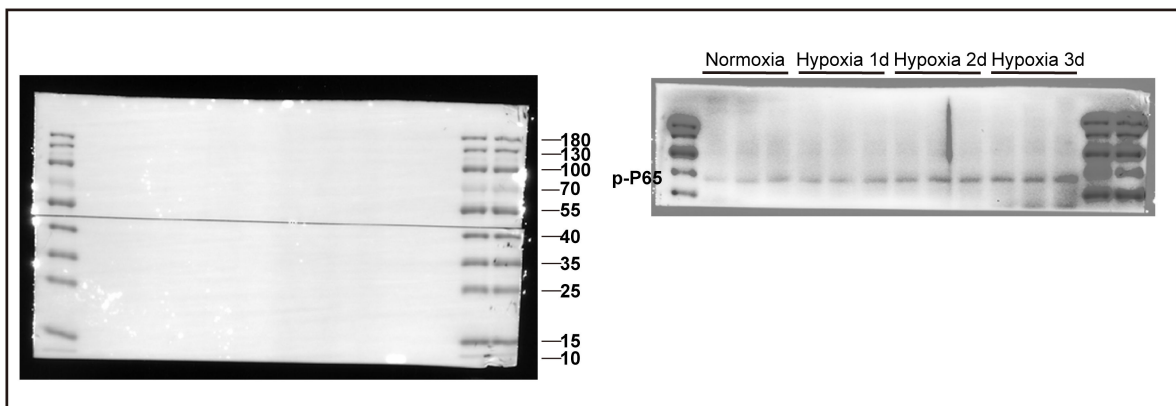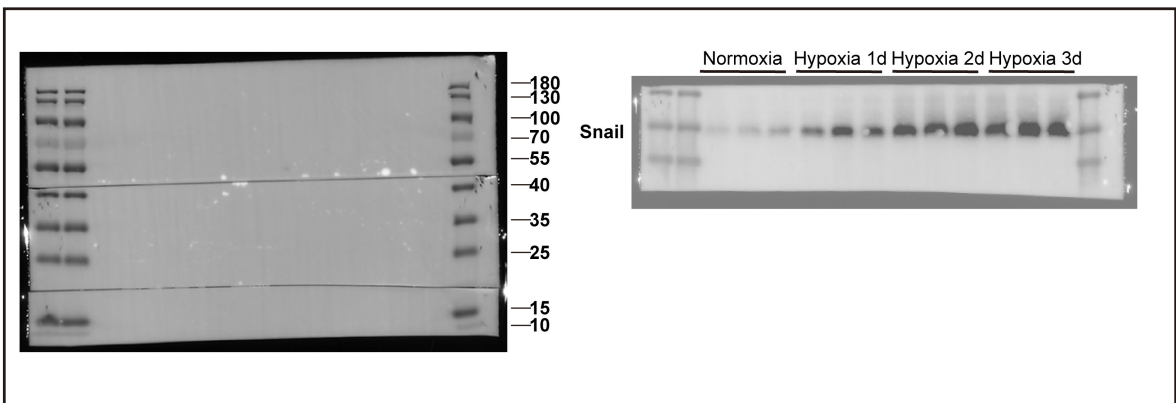

**Fig. S7a**

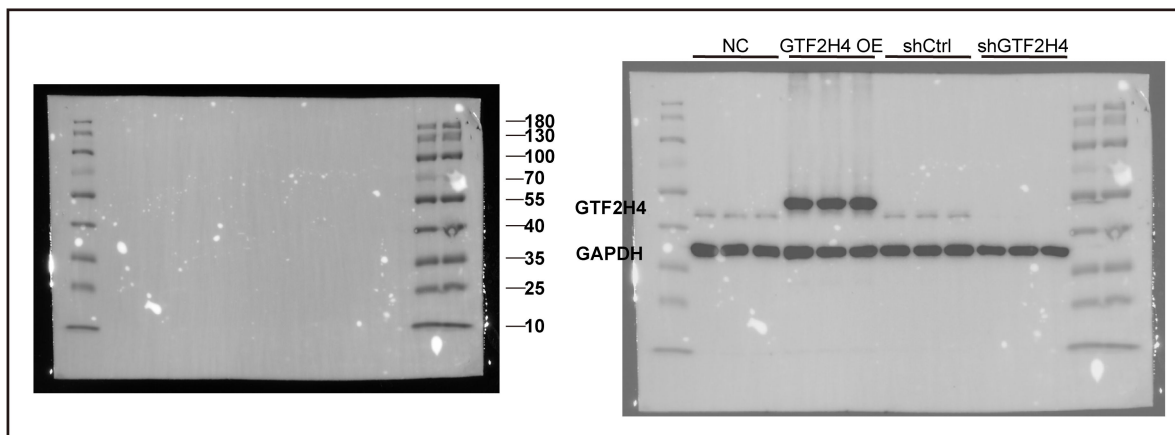

**Fig. S7e**

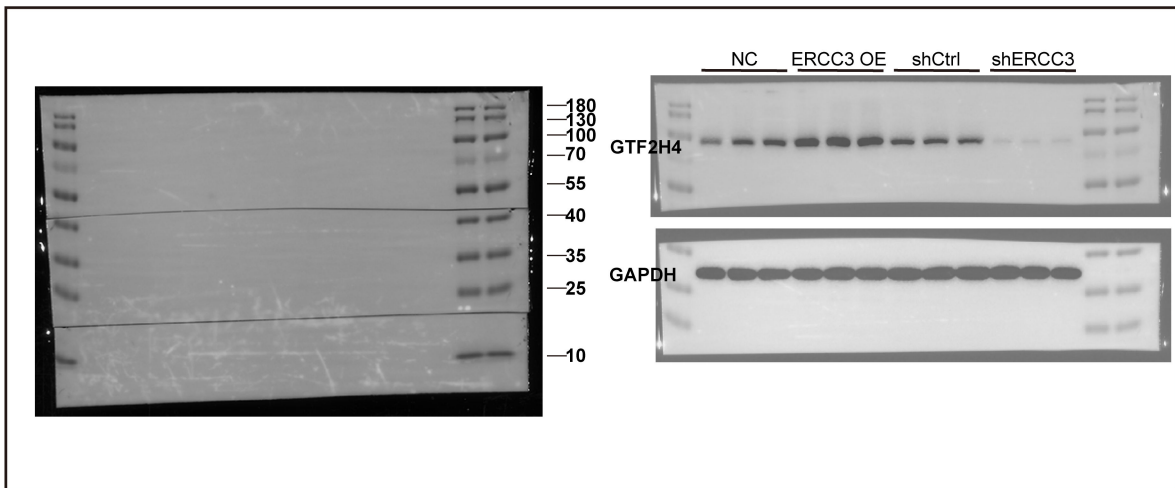

**Fig. S7h**

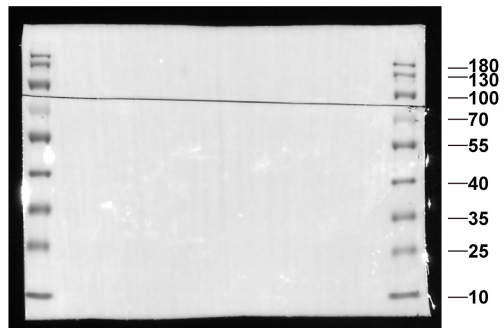

ERCC3 OE:                    Normoxia                    Hypoxia  
                                 - - - + + +                    - - - + + +

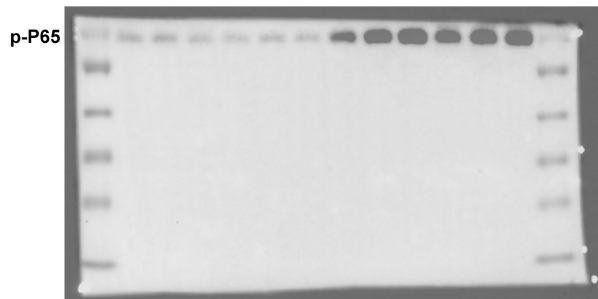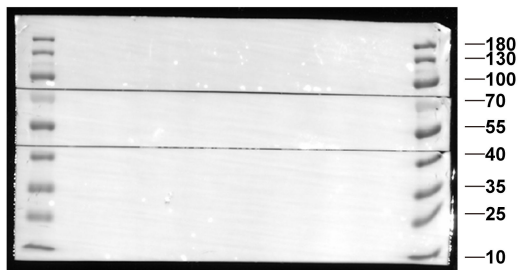

ERCC3 OE:                    Normoxia                    Hypoxia  
                                 - - - + + +                    - - - + + +

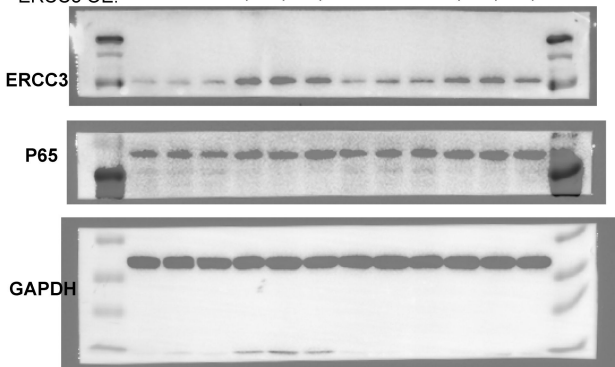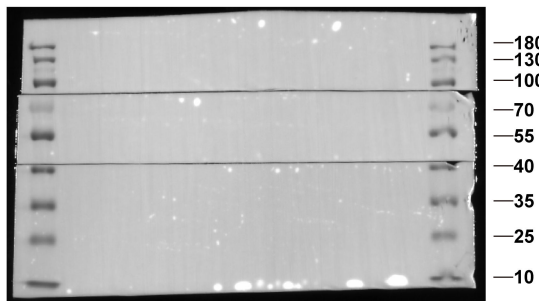

ERCC3 OE:                    Normoxia                    Hypoxia  
                                 - - - + + +                    - - - + + +

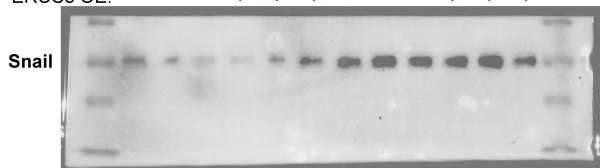

**Fig. S7i**

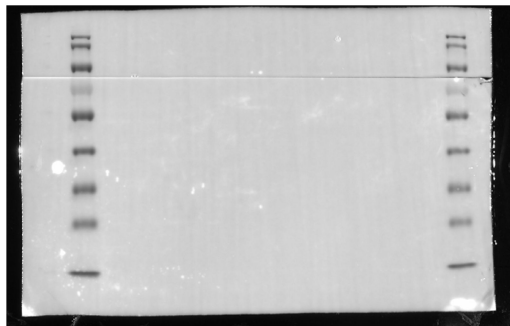

—180  
—130  
—100  
—70  
—55  
—40  
—35  
—25  
—10

GAPDH

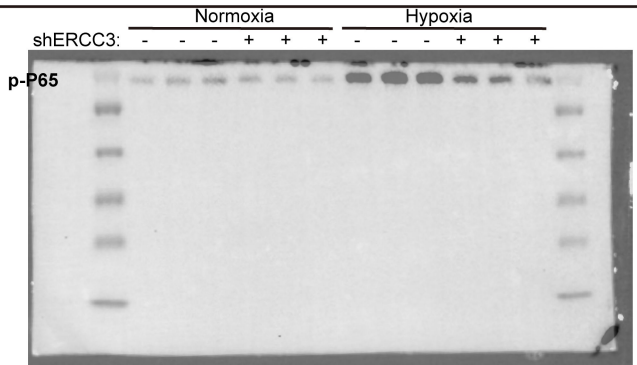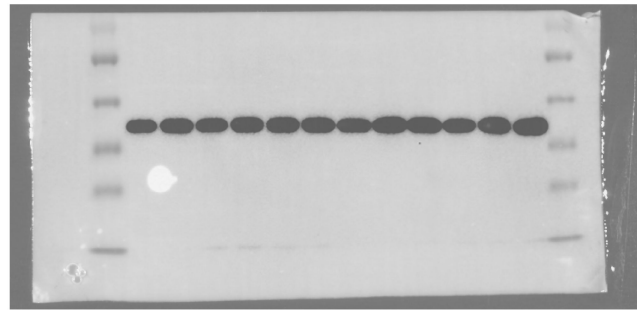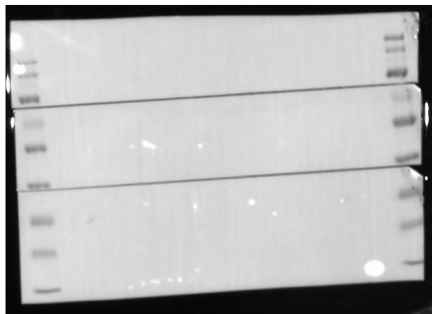

—180  
—130  
—100  
—70  
—55  
—40  
—35  
—25  
—10

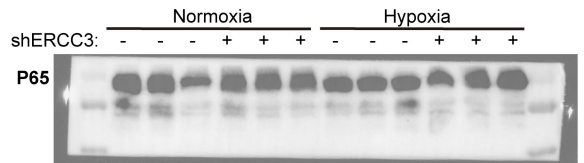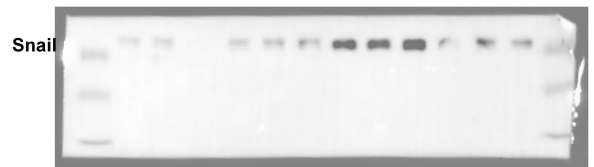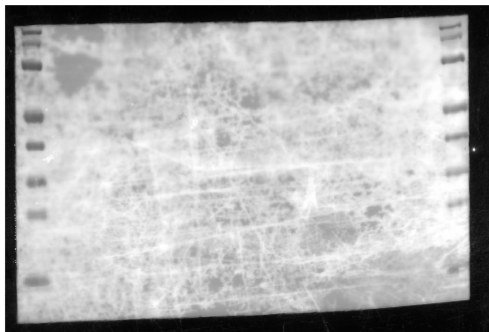

—180  
—130  
—100  
—70  
—55  
—40  
—35  
—25  
—10

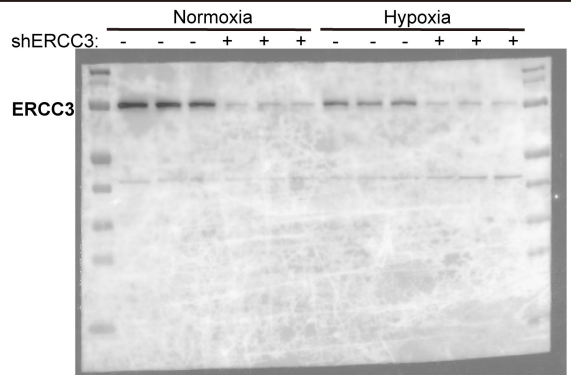

**Fig. S8b**

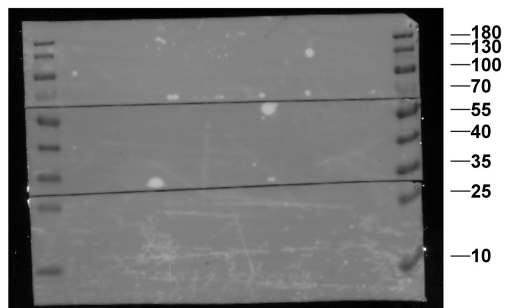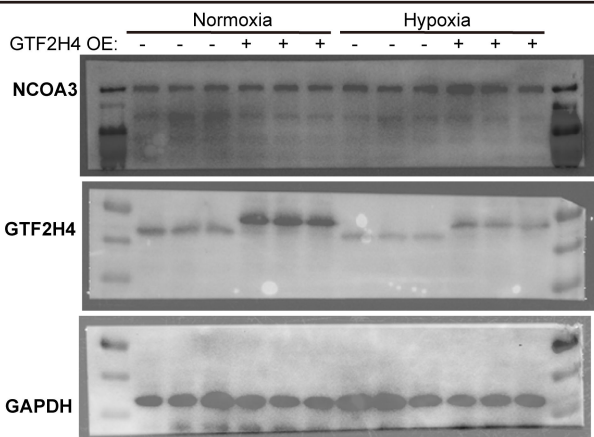

**Fig. S8c**

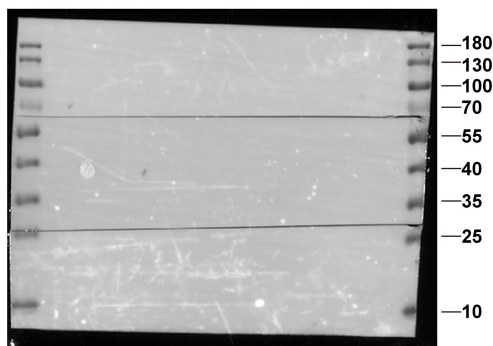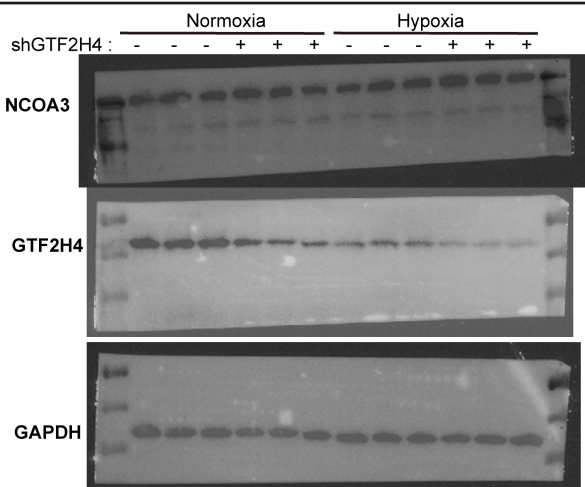

**Fig. S8d**

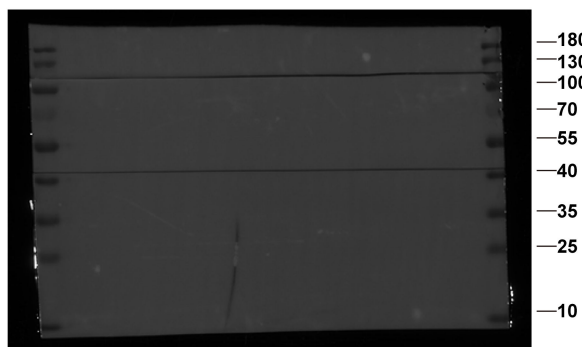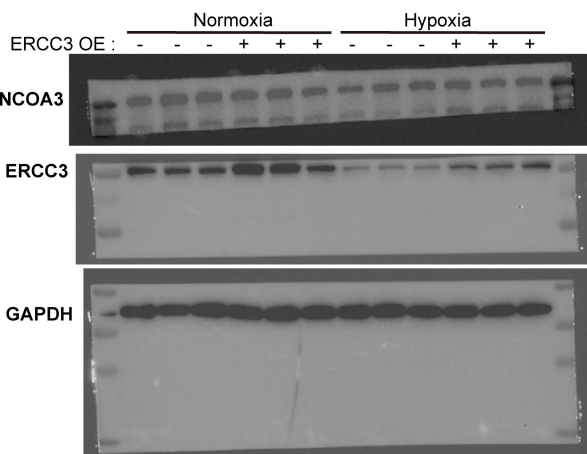

**Fig. S8e**

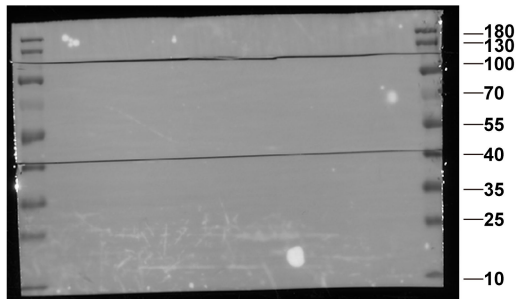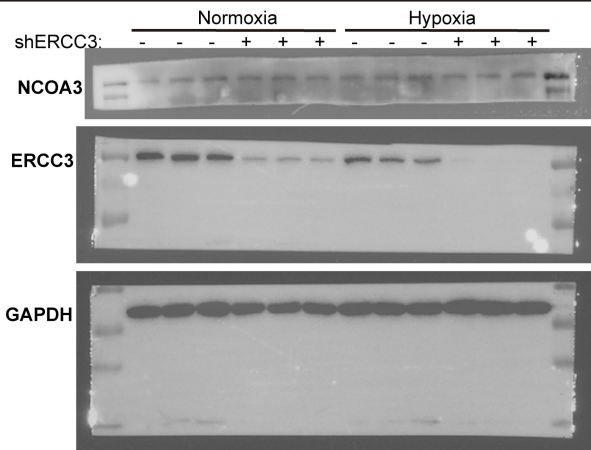

**Fig. S8f**

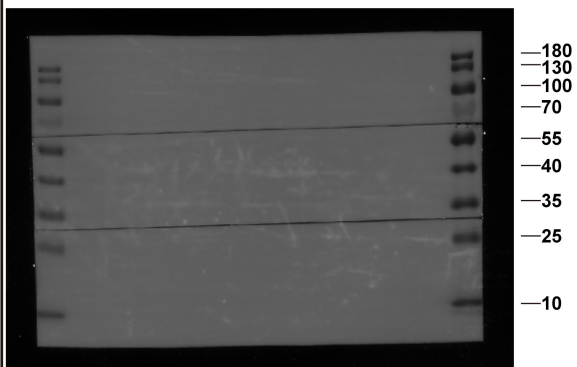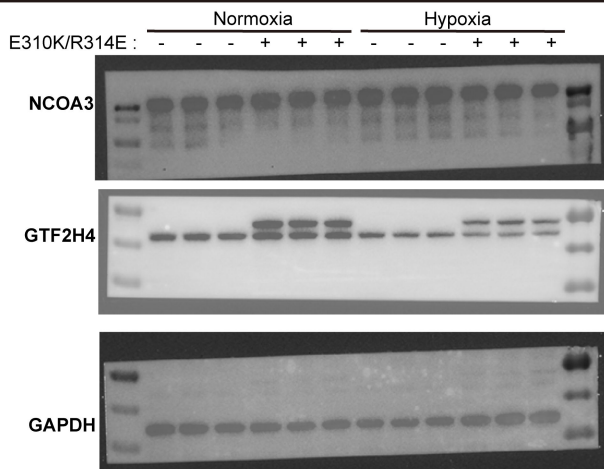

Supplement: mmc2.pdf [file mmc2.pdf]
